# Supplementary material for: Protein corona composition of gold nanoparticles/nanorods affects amyloid beta fibrillation process
Source: Royal Society of Chemistry journal article supplement (doi:10.1039/c4nr06009a), 2015-01-01
Supplement: c4nr06009a1.pdf [file c4nr06009a1.pdf]

## Supporting Information

### Protein Corona Composition of Gold Nanoparticles/Nanorods Affects Amyloid Beta

#### Fibrillation Process

Somayeh Mirsadeghi<sup>a</sup>, Rasoul Dinarvand<sup>a,b\*</sup>, Mohammad Hossein Ghahremani<sup>c</sup>, Mohammad Reza Hormozinezhad<sup>d</sup>, Zohreh Mahmoudi<sup>a</sup>, Mohammad Javad Hajipour<sup>a</sup>, Fatemeh Atyabi<sup>a,b</sup>, Mahdi Ghavami<sup>a</sup>, and Morteza Mahmoudi<sup>a,b,e\*</sup>

<sup>a</sup>Nanotechnology Research Center, School of Pharmacy, Tehran University of Medical Science, Tehran, Iran.

<sup>b</sup>Department of Nanotechnology, School of Pharmacy, Tehran University of Medical Science, Tehran, Iran.

<sup>c</sup>Department of Pharmacology and Toxicology, School of Pharmacy, Tehran University of Medical Sciences, Tehran, Iran.

<sup>d</sup>School of Chemistry, Sharif University of Technology, Tehran, Iran.

<sup>e</sup>Division of Cardiovascular Medicine, Stanford University School of Medicine, Stanford, California 94305-5101, United States

\*Corresponding Authors: (RD) email: [dinarvand@tums.ac.ir](mailto:dinarvand@tums.ac.ir); email: ;(MM)

[mahmoudi@stanford.edu](mailto:mahmoudi@stanford.edu)

## **Materials**

HAuCl<sub>4</sub>.3H<sub>2</sub>O (99.9%), NaBH<sub>4</sub> (99%), L-Ascorbic acid (99+ %), AgNO<sub>3</sub> (99+ %), The A $\beta$  (1-42)peptide(MDAEFRHDSGYEVHHQKLVFFAEDVGSNKGAIIGLMVGGVVIA) and Thioflavin T were used as purchased (Sigma). Etyltrimethylammonium bromide (CTAB, 99%) was used as purchased (Merck). Ultrapure deionized water (DI; Continental Water Systems) was used for all solution preparations and experiments. Glassware was cleaned by soaking in aqua regia and finally washing with DI water. FBS and HP was purchased from Iranian Blood Transfusion Organization (IBTO).

## **Instrumentation**

Absorption spectra were taken on a Shimadzu UVmini-1240 UV-Vis Spectrophotometer (Japan) with the use of quartz cell. Measurements of pH were made with a Denver Instrument Model of 270 pH meter equipped with a Metrohm glass electrode. Size distributions of the particles were obtained using Malvern Zetasizer Nano ZS90 at room temperature. Transmission Electron Microscopy (TEM) images were registered with a BOSCH at an acceleration voltage of 80 KV. Amyloid  $\beta$  fibrillation was recorded using Hybrid Technology™ Synergy H4 Performance (BioTek Instruments, Inc., Winooski, Vermont, USA) with 96 well black fluorescence plate, NUNC 96 black Polypropylene MicroWell™ Plates (Sigma).

**Table S1. Thickness of protein in NPs-Protein Interaction in situ Sphere ~20 nm FBS10%**

| Name            | Peak 1 $\lambda$ (nm) | Absorption          | Shift | Thickness[nm] |
|-----------------|-----------------------|---------------------|-------|---------------|
| Without Protein | 526.6                 | 0.7568              | 0     | 0             |
| 0 min           | 529.6                 | 0.5076 $\pm$ 0.013  | 3     | 13.22         |
| 2 min           | 531.4                 | 0.5561 $\pm$ 0.004  | 4.8   | 11.42         |
| 4 min           | 531.9                 | 0.5702 $\pm$ 0.009  | 5.3   | 11.04         |
| 6 min           | 532.1                 | 0.5802 $\pm$ 0.017  | 5.5   | 10.9          |
| 8 min           | 532                   | 0.5831 $\pm$ 0.0104 | 5.4   | 10.97         |
| 10 min          | 532.4                 | 0.5826 $\pm$ 0.014  | 5.8   | 10.7          |
| 12 min          | 533.2                 | 0.5816 $\pm$ 0.016  | 6.6   | 10.2          |
| 14 min          | 532.2                 | 0.5796 $\pm$ 0.001  | 5.6   | 10.83         |
| 16 min          | 531.9                 | 0.5753 $\pm$ 0.002  | 5.3   | 11.04         |
| 18 min          | 529.6                 | 0.5708 $\pm$ 0.0006 | 3     | 13.22         |
| 20 min          | 529.9                 | 0.5661 $\pm$ 0.002  | 3.3   | 12.85         |

**Table S2. Thickness of protein in NPs-Protein Interaction in situ Sphere ~30 nm FBS****10%**

| Name            | Peak $\lambda$ (nm) | Absorption          | Shift [nm] | Thickness [s] (nm) |
|-----------------|---------------------|---------------------|------------|--------------------|
| Without protein | 526                 | 0.601194            | 0          | 0                  |
| 0 min           | 526.5               | 0.4302 $\pm$ 0.04   | 0.5        | 12.12              |
| 2 min           | 527                 | 0.4585 $\pm$ 0.03   | 1          | 10.5               |
| 4 min           | 527                 | 0.4589 $\pm$ 0.02   | 1          | 10.5               |
| 6 min           | 528                 | 0.4609 $\pm$ 0.0167 | 2          | 8.9                |
| 8 min           | 527.5               | 0.4734 $\pm$ 0.021  | 1.5        | 9.6                |
| 10 min          | 527.5               | 0.4678 $\pm$ 0.0161 | 1.5        | 9.6                |
| 12 min          | 528.5               | 0.4602 $\pm$ 0.01   | 2.5        | 8.4                |
| 14 min          | 526.5               | 0.4626 $\pm$ 0.011  | 0.5        | 10.12              |
| 16 min          | 527                 | 0.4696 $\pm$ 0.0145 | 1          | 9.5                |
| 18 min          | 527.5               | 0.4674 $\pm$ 0.0126 | 1.5        | 9.6                |
| 20 min          | 527.5               | 0.4657 $\pm$ 0.011  | 1.5        | 9.6                |

**Table S3. Thickness of protein in NPs-Protein Interaction in situ Short rods FBS 10%**

| Name            | Peak 1 $\lambda$ (nm) | Absorption         | Shift [nm] | Thickness [nm] | Peak 2 $\lambda$ (nm) | Absorption          | Shift [nm] | Thickness [nm] |
|-----------------|-----------------------|--------------------|------------|----------------|-----------------------|---------------------|------------|----------------|
| Without Protein | 510.5                 | 0.664681           | 0          | 0              | 674                   | 1.434005            | 0          | 0              |
| 0 min           | 510.4                 | 0.4310 $\pm$ 0.002 | 0.1        | 10.74          | 687.7                 | 0.7789 $\pm$ 0.0011 | 13.7       | 10.82          |
| 2 min           | 511.9                 | 0.4305 $\pm$ 0.009 | 1.4        | 6.74           | 689.2                 | 0.7635 $\pm$ 0.0007 | 15.2       | 10.25          |
| 4 min           | 514.9                 | 0.4222 $\pm$ 0.005 | 4.4        | 4.6            | 689.8                 | 0.7537 $\pm$ 0.005  | 15.8       | 10.04          |
| 6 min           | 515.2                 | 0.4231 $\pm$ 0.007 | 4.7        | 4.5            | 692.2                 | 0.7708 $\pm$ 0.006  | 18.2       | 9.3            |
| 8 min           | 515.4                 | 0.4228 $\pm$ 0.003 | 4.9        | 4.44           | 692.5                 | 0.7646 $\pm$ 0.0015 | 18.5       | 9.2            |
| 10 min          | 515.2                 | 0.4203 $\pm$ 0.006 | 4.7        | 4.5            | 691.9                 | 0.7649 $\pm$ 0.007  | 17.9       | 9.4            |
| 12 min          | 513.4                 | 0.4217 $\pm$ 0.006 | 2.9        | 5.3            | 691                   | 0.7666 $\pm$ 0.002  | 17         | 9.65           |
| 14 min          | 513                   | 0.4161 $\pm$ 0.008 | 2.5        | 5.53           | 692.8                 | 0.7590 $\pm$ 0.004  | 18.2       | 9.3            |
| 16 min          | 515.5                 | 0.4139 $\pm$ 0.002 | 5          | 4.41           | 693.4                 | 0.7482 $\pm$ 0.002  | 19.4       | 8.94           |
| 18 min          | 512.8                 | 0.4025 $\pm$ 0.001 | 2.3        | 5.7            | 692.8                 | 0.7267 $\pm$ 0.005  | 18.8       | 9.1            |
| 20 min          | 514.9                 | 0.3947 $\pm$ 0.012 | 4.4        | 4.6            | 693.1                 | 0.7248 $\pm$ 0.0077 | 19.1       | 9.02           |

**Table S4. Thickness of protein in NPs-Protein Interaction in situ Long rods FBS 10%**

| Name            | Peak 1 $\lambda$ (nm) | Absorption          | Shift [nm] | Thickness[nm] |
|-----------------|-----------------------|---------------------|------------|---------------|
| Without Protein | 528.7                 | 0.9275              | 0          | 0             |
| 0 min           | 514.9                 | 0.7788 $\pm$ 0.004  | 13.4       | 4.8           |
| 2 min           | 522.7                 | 0.7562 $\pm$ 0.008  | 6          | 7             |
| 4 min           | 520                   | 0.7070 $\pm$ 0      | 8.7        | 6             |
| 6 min           | 518.2                 | 0.7065 $\pm$ 0.0001 | 10.5       | 5.5           |
| 8 min           | 522.7                 | 0.6982 $\pm$ 0.0007 | 6          | 7             |
| 10 min          | 523.3                 | 0.6862 $\pm$ 0.0018 | 5.4        | 7.25          |
| 12 min          | 521.5                 | 0.6752 $\pm$ 0.0003 | 7.2        | 6.5           |
| 14 min          | 518.5                 | 0.6658 $\pm$ 0.0008 | 10.5       | 5.5           |
| 16 min          | 523.6                 | 0.6629 $\pm$ 0.0005 | 5.1        | 7.4           |
| 18 min          | 520.9                 | 0.6616 $\pm$ 0.0003 | 6.8        | 6.6           |
| 20 min          | 521.8                 | 0.6651 $\pm$ 0.0003 | 6.9        | 6.6           |

**Table S5. Thickness of protein in NPs-Protein Interaction in situ Sphere ~20 nm FBS****100%**

| Name            | Peak 1 $\lambda$ (nm) | Absorption          | Shift [nm] | Thickness [nm] |
|-----------------|-----------------------|---------------------|------------|----------------|
| Without Protein | 526                   | 1.8035              | 0          | 0              |
| 0 min           | 526.5                 | 0.9297 $\pm$ 0.005  | 0.5        | 12.12          |
| 2 min           | 526.5                 | 0.9766 $\pm$ 0.04   | 0.5        | 12.12          |
| 4 min           | 525.5                 | 0.8706 $\pm$ 0.032  | 1.5        | 9.58           |
| 6 min           | 526.5                 | 0.9154 $\pm$ 0.01   | 0.5        | 12.12          |
| 8 min           | 525.5                 | 0.9427 $\pm$ 0.043  | 0.5        | 12.12          |
| 10 min          | 526.5                 | 0.9633 $\pm$ 0.065  | 0.5        | 12.12          |
| 12 min          | 526.5                 | 0.9784 $\pm$ 0.082  | 0.5        | 12.12          |
| 14 min          | 527                   | 0.9886 $\pm$ 0.0036 | 1          | 10.5           |
| 16 min          | 527                   | 0.9936 $\pm$ 0.027  | 1          | 10.5           |
| 18 min          | 525.5                 | 0.9960 $\pm$ 0.006  | 0.5        | 12.12          |
| 20 min          | 527                   | 1.0035 $\pm$ 0.027  | 1          | 10.5           |

**Table S6. Thickness of protein in NPs-Protein Interaction in situ Sphere ~30 nm FBS****100%**

| Name            | Peak 1 $\lambda$ (nm) | Absorption          | Shift | Thickness [nm] |
|-----------------|-----------------------|---------------------|-------|----------------|
| Without Protein | 526.6                 | 1.0175              | 0     | 0              |
| 0 min           | 527.1                 | 0.7596 $\pm$ 0.02   | 0.5   | 20.08          |
| 2 min           | 527.9                 | 0.6977 $\pm$ 0.003  | 1.3   | 16.42          |
| 4 min           | 528                   | 0.7339 $\pm$ 0.02   | 1.4   | 16.14          |
| 6 min           | 528.8                 | 0.7519 $\pm$ 0.026  | 2.2   | 14.41          |
| 8 min           | 528.9                 | 0.7641 $\pm$ 0.015  | 2.3   | 14.24          |
| 10 min          | 529                   | 0.7708 $\pm$ 0.002  | 2.6   | 13.7           |
| 12 min          | 529.2                 | 0.7762 $\pm$ 0.002  | 2.8   | 13.5           |
| 14 min          | 529.9                 | 0.7802 $\pm$ 0.005  | 3.3   | 12.85          |
| 16 min          | 528.2                 | 0.7816 $\pm$ 0.0092 | 2.1   | 14.6           |
| 18 min          | 529.9                 | 0.7858 $\pm$ 0.0096 | 3.3   | 12.85          |
| 20 min          | 530.6                 | 0.7878 $\pm$ 0.01   | 4     | 12.12          |

**Table S7. Thickness of protein in NPs-Protein Interaction in situ Short Rods FBS 100%**

| Name            | Peak 1 $\lambda$ (nm) | Absorption          | Shift [nm] | Thickness [nm] | Peak 2 $\lambda$ (nm) | Absorption        | Shift [nm] | Thickness [nm] |
|-----------------|-----------------------|---------------------|------------|----------------|-----------------------|-------------------|------------|----------------|
| Without Protein | 510.5                 | 0.6646 $\pm$ 0.001  | 0          | 0              | 674                   | 1.4340            | 0          | 0              |
| 0 min           | 517                   | 0.6627 $\pm$ 0.001  | 6.5        | 3.75           | 683.3                 | 0.6552 $\pm$ 0.05 | 9.3        | 12.88          |
| 2 min           | 514.6                 | 0.3702 $\pm$ 0.002  | 4.1        | 4.45           | 684.1                 | 0.7283 $\pm$ 0.14 | 10.1       | 12.5           |
| 4 min           | 514                   | 0.5184 $\pm$ 0.04   | 3.5        | 4.7            | 683.5                 | 0.7827 $\pm$ 0.14 | 9.5        | 12.77          |
| 6 min           | 513.1                 | 0.5433 $\pm$ 0.02   | 3.1        | 4.88           | 682.6                 | 0.8197 $\pm$ 0.12 | 8.6        | 13.3           |
| 8 min           | 511                   | 0.5569 $\pm$ 0.01   | 0.5        | 7.66           | 683.5                 | 0.8490 $\pm$ 0.1  | 9.5        | 12.77          |
| 10 min          | 512.5                 | 0.5445 $\pm$ 0.03   | 2          | 5.5            | 682.6                 | 0.8819 $\pm$ 0.09 | 8.6        | 13.3           |
| 12 min          | 510.4                 | 0.5503 $\pm$ 0.0006 | 0.1        | 10.11          | 681.7                 | 0.8999 $\pm$ 0.07 | 7.7        | 13.9           |
| 14 min          | 510.4                 | 0.5537 $\pm$ 0.014  | 0.1        | 10.11          | 682                   | 0.9203 $\pm$ 0.05 | 8          | 6.85           |
| 16 min          | 510.4                 | 0.5422 $\pm$ 0.007  | 0.1        | 10.11          | 682.3                 | 0.9371 $\pm$ 0.03 | 8.3        | 13.5           |
| 18 min          | 510.1                 | 0.5440 $\pm$ 0.013  | 0.4        | 8.00           | 683.1                 | 0.9482 $\pm$ 0.05 | 9.1        | 13.00          |
| 20 min          | 511                   | 0.5595 $\pm$ 0.002  | 0.5        | 7.66           | 683.2                 | 0.9586 $\pm$ 0.01 | 9.2        | 12.94          |

**Table S8. Thickness of protein in NPs-Protein Interaction in situ Long Rods FBS 100%**

| Name            | Peak 1 $\lambda$ (nm) | Absorption          | Shift [nm] | Thickness [nm] |
|-----------------|-----------------------|---------------------|------------|----------------|
| Without Protein | 527.5                 | 0.6563 $\pm$ 0      | 0          | 0              |
| 0 min           | 522.4                 | 0.5875 $\pm$ 0.007  | 5.1        | 7.4            |
| 2 min           | 519.4                 | 0.6059 $\pm$ 0      | 8.1        | 6.15           |
| 4 min           | 518.8                 | 0.5829 $\pm$ 0      | 8.7        | 6              |
| 6 min           | 520.3                 | 0.5524 $\pm$ 0.0003 | 7.2        | 6.5            |
| 8 min           | 513.7                 | 0.5205 $\pm$ 0.009  | 13.8       | 4.7            |
| 10 min          | 507.4                 | 0.5754 $\pm$ 0.0001 | 20.1       | 3.7            |
| 12 min          | 512.2                 | 0.5195 $\pm$ 0.0007 | 15.3       | 4.44           |
| 14 min          | 509.8                 | 0.4691 $\pm$ 0.0005 | 17.7       | 4              |
| 16 min          | 509.5                 | 0.4167 $\pm$ 0.0003 | 18         | 4              |
| 18 min          | 508.6                 | 0.3856 $\pm$ 0.0001 | 18.9       | 3.9            |
| 20 min          | 505.9                 | 0.3505 $\pm$ 0      | 21.6       | 3.5            |

**Table S9. Thickness of protein in NPs-Protein Interaction in situ Sphere ~20 nm HP****10%**

| Name            | Peak 1 | Absorption   | Shift [nm] | Thickness [nm] |
|-----------------|--------|--------------|------------|----------------|
| Without Protein | 526    | 1.8719       | 0          | 0              |
| 0 min           | 527    | 0.7821±0.02  | 1          | 10.51          |
| 2 min           | 527.5  | 0.8446±0.05  | 1.5        | 9.58           |
| 4 min           | 528    | 0.8920±0.04  | 2          | 8.91           |
| 6 min           | 529    | 0.9095±0.02  | 3          | 8              |
| 8 min           | 527.5  | 0.9234±0.02  | 1.5        | 9.58           |
| 10 min          | 527.5  | 0.9351±0.02  | 1.5        | 9.58           |
| 12 min          | 530    | 0.9434±0.014 | 3          | 8              |
| 14 min          | 530.5  | 0.9518±0.018 | 3.5        | 7.6            |
| 16 min          | 530    | 0.9559±0.012 | 3          | 8              |
| 18 min          | 530    | 0.9589±0.014 | 3          | 8              |

**Table S10. Thickness of protein in NPs-Protein Interaction in situ Sphere ~30 nm HP****10%**

| Name            | Peak 1 | Absorption    | Shift [nm] | Thickness [nm] |
|-----------------|--------|---------------|------------|----------------|
| Without Protein | 543    | 0.3758        | 0          | 0              |
| 0 min           | 545    | 0.1353±0.0008 | 2          | 14.9           |
| 2 min           | 545.5  | 0.1678±0.0008 | 2.5        | 14.04          |
| 4 min           | 545    | 0.1928±0.0008 | 2          | 14.9           |
| 6 min           | 545.5  | 0.2076±0.0008 | 2.5        | 14.04          |
| 8 min           | 545.5  | 0.2156±0.0008 | 2.5        | 14.04          |
| 10 min          | 546    | 0.2225±0.0008 | 3          | 13.34          |
| 12 min          | 544.5  | 0.2282±0.0008 | 1.5        | 15.9           |
| 14 min          | 545    | 0.2313±0.0008 | 2          | 14.9           |
| 16 min          | 545.5  | 0.2385±0.0008 | 2.5        | 14.04          |
| 18 min          | 545    | 0.2382±0.0008 | 2          | 14.9           |
| 20 min          | 545.5  | 0.2421±0.0008 | 2.5        | 14.04          |

**Table S11. Thickness of protein in NPs-Protein Interaction in situ Short rods HP 10%**

| Name            | Peak 1<br>$\lambda$ (nm) | Absorption         | Shift<br>[nm] | Thickness<br>[nm] | Peak 2<br>$\lambda$ (nm) | Absorption          | Shift<br>[nm] | Thickness<br>[nm] |
|-----------------|--------------------------|--------------------|---------------|-------------------|--------------------------|---------------------|---------------|-------------------|
| Without Protein | 510.5                    | 0.6646             | 0             | 0                 | 674                      | 1.4340              | 0             | 0                 |
| 0 min           | 508                      | 0.3158 $\pm$ 0.005 | 2.5           | 5.21              | 685                      | 0.4155 $\pm$ 0.005  | 13            | 11.1              |
| 2 min           | 514                      | 0.5455 $\pm$ 0.031 | 3.4           | 4.74              | 685                      | 0.5988 $\pm$ 0.0006 | 13            | 11.1              |
| 4 min           | 506                      | 0.5994 $\pm$ 0.04  | 3.5           | 4.7               | 679.5                    | 0.6342 $\pm$ 0.002  | 5.5           | 15.5              |
| 6 min           | 509                      | 0.5173 $\pm$ 0.025 | 1.5           | 6                 | 679.5                    | 0.6512 $\pm$ 0.0004 | 5.5           | 15.5              |
| 8 min           | 510.6                    | 0.5247 $\pm$ 0.026 | 0.1           | 10.11             | 681.5                    | 0.6597 $\pm$ 0.0007 | 7.5           | 14.01             |
| 10 min          | 510.6                    | 0.5284 $\pm$ 0.03  | 0.1           | 10.11             | 681.5                    | 0.6654 $\pm$ 0.002  | 7.5           | 14.01             |
| 12 min          | 511                      | 0.5292 $\pm$ 0.03  | 0.5           | 7.7               | 682                      | 0.6688 $\pm$ 0.0008 | 8             | 13.73             |
| 14 min          | 509                      | 0.5294 $\pm$ 0.03  | 0.5           | 7.7               | 681.5                    | 0.6702 $\pm$ 0.000  | 7.5           | 14.01             |
| 16 min          | 511                      | 0.5274 $\pm$ 0.03  | 1.5           | 6                 | 681.5                    | 0.6699 $\pm$ 0.0005 | 7.5           | 14.01             |
| 18 min          | 509                      | 0.5266 $\pm$ 0.03  | 1.5           | 6                 | 682                      | 0.6704 $\pm$ 0.0002 | 8             | 13.73             |
| 20 min          | 514                      | 0.5238 $\pm$ 0.03  | 3.5           | 4.7               | 682.5                    | 0.6697 $\pm$ 0.0005 | 8.5           | 13.4              |

**Table S12. Thickness of protein in NPs-Protein Interaction in situ Long rods HP 10%**

| Time (min)      | Peak 1 | Absorption        | Shift [nm] | Thickness [nm] |
|-----------------|--------|-------------------|------------|----------------|
| Without Protein | 528.7  | 0.9275            | 0          | 0              |
| 0               | 527.5  | 0.6684 $\pm$ 0.02 | 1.2        | 11.31          |
| 2               | 520    | 0.6501 $\pm$ 0.02 | 8.7        | 6              |
| 4               | 522.7  | 0.6016 $\pm$ 0.02 | 6          | 7              |
| 6               | 515.2  | 0.6011 $\pm$ 0.02 | 13.5       | 4.8            |
| 8               | 518.5  | 0.5942 $\pm$ 0.02 | 10.2       | 5.53           |
| 10              | 515.2  | 0.5842 $\pm$ 0.02 | 13.5       | 4.8            |
| 12              | 519.7  | 0.5704 $\pm$ 0.02 | 9          | 5.9            |
| 14              | 517.6  | 0.5609 $\pm$ 0.02 | 11.1       | 5.3            |
| 16              | 516.4  | 0.5586 $\pm$ 0.04 | 12.3       | 5              |
| 18              | 521.2  | 0.5568 $\pm$ 0.04 | 7.5        | 6.4            |
| 20              | 521.2  | 0.5603 $\pm$ 0.02 | 7.5        | 6.4            |



**Table S13. Thickness of protein in NPs-Protein Interaction in situ Sphere ~20 nm HP****100%**

| Time (min)      | Peak 1 | Absorption    | Shift | Thickness[nm] |
|-----------------|--------|---------------|-------|---------------|
| Without Protein | 526    | 0.6239        | 0     | 0             |
| 0               | 526.7  | 0.5421±0.001  | 0.7   | 11.34         |
| 2               | 527.9  | 0.5589±0.0007 | 1.9   | 9.03          |
| 4               | 528.8  | 0.5583±0.0007 | 2.8   | 8.14          |
| 6               | 530.2  | 0.5589±0.0008 | 4.2   | 7.2           |
| 8               | 529.6  | 0.5606±0.0008 | 3.6   | 7.55          |
| 10              | 530.2  | 0.5583±0.0008 | 4.2   | 7.2           |
| 12              | 528.4  | 0.5577±0.0008 | 2.4   | 8.5           |
| 14              | 527.3  | 0.5571±0.0008 | 1.3   | 9.91          |
| 16              | 527.2  | 0.5526±0.0008 | 1.2   | 10.1          |
| 18              | 529.7  | 0.5472±0.0008 | 3.7   | 7.5           |
| 20              | 529.4  | 0.5773±0.0008 | 3.4   | 7.67          |

**Table S14. Thickness of protein in NPs-Protein Interaction in situ Sphere ~30 nm HP****100%**

| Name            | Peak 1 | Absorption    | Shift [nm] | Thickness [nm] |
|-----------------|--------|---------------|------------|----------------|
| Without Protein | 543    | 0.3758        | 0          | 0              |
| 0               | 540.3  | 0.3071±0.0007 | 2.7        | 13.75          |
| 2               | 540.2  | 0.3064±0.0007 | 2.8        | 13.6           |
| 4               | 539.9  | 0.3048±0.0007 | 3.1        | 13.21          |
| 6               | 539.6  | 0.3048±0.0008 | 3.4        | 12.86          |
| 8               | 539.9  | 0.3047±0.0008 | 3.1        | 13.21          |
| 10              | 539.6  | 0.3035±0.0011 | 3.4        | 12.86          |
| 12              | 540.9  | 0.3147±0.0008 | 4.1        | 12.14          |
| 14              | 538    | 0.3045±0.0008 | 5          | 11.4           |
| 16              | 538    | 0.3051±0.0008 | 5          | 11.4           |
| 18              | 540.6  | 0.3059±0.0008 | 4.4        | 11.9           |
| 20              | 540.3  | 0.2960±0.0008 | 4.7        | 11.62          |

**Table S15. Thickness of protein in NPs-Protein Interaction in situ Short Rods HP 100%**

| Name            | Peak 1 $\lambda$ (nm) | Absorption    | Shift [nm] | Thickness [nm] | Peak 2 $\lambda$ (nm) | Absorption    | Shift [nm] | Thickness [nm] |
|-----------------|-----------------------|---------------|------------|----------------|-----------------------|---------------|------------|----------------|
| Without Protein | 520.3                 | 0.6607        | 0          | 0              | 674                   | 1.8737        | 0          | 0              |
| 0 min           | 528.7                 | 0.6183±0.001  | 8.4        | 3.4            | 680                   | 0.9089±0.0007 | 6          | 15.3           |
| 2 min           | 520.6                 | 0.6163±0.0001 | 0.3        | 8.5            | 680                   | 0.9164±0.0007 | 6          | 15.3           |
| 4 min           | 521.8                 | 0.6089±0.002  | 1.5        | 6.01           | 683                   | 0.9215±0.0008 | 9          | 13.09          |
| 6 min           | 521.5                 | 0.6157±0.005  | 1.2        | 6.35           | 682.6                 | 0.9114±0.0008 | 8.5        | 13.4           |
| 8 min           | 520.6                 | 0.6101±0.01   | 0.3        | 8.5            | 682.5                 | 0.9042±0.0008 | 8.2        | 13.6           |
| 10 min          | 519.7                 | 0.6029±0.005  | 0.7        | 7.17           | 680.3                 | 0.8786±0.0008 | 6.3        | 15.02          |
| 12 min          | 521.5                 | 0.5961±0.002  | 1.2        | 6.35           | 687                   | 0.8673±0.0008 | 13         | 11.1           |
| 14 min          | 518.8                 | 0.5824±0.04   | 1.5        | 6.01           | 687                   | 0.8321±0.0008 | 13         | 11.1           |
| 16 min          | 521.2                 | 0.5698±0.007  | 0.9        | 6.8            | 686.3                 | 0.8307±0.0008 | 12.3       | 11.4           |
| 18 min          | 517.6                 | 0.5269±0.007  | 2.7        | 5.12           | 684.2                 | 0.7606±0.0008 | 10.2       | 12.4           |
| 20 min          | 521.2                 | 0.5222±0.007  | 0.9        | 6.8            | 683                   | 0.7538±0.0008 | 9          | 13.09          |

**Table S16. Thickness of protein in NPs-Protein Interaction in situ Long Rods HP 100%**

| Time (min)      | Peak 1 | Absorption    | Shift [nm] | Thickness[nm] |
|-----------------|--------|---------------|------------|---------------|
| Without Protein | 528.7  | 0.9275        | 0          | 0             |
| 0               | 518.5  | 0.6452±0.001  | 10.2       | 5.53          |
| 2               | 519.5  | 0.6583±0.001  | 9.2        | 5.81          |
| 4               | 520.5  | 0.6574±0.0001 | 8.2        | 6.12          |
| 6               | 520    | 0.6557±0.0017 | 8.7        | 6             |
| 8               | 520.5  | 0.6516±0.0005 | 8.2        | 6.12          |
| 10              | 517    | 0.6504±0.0014 | 11.7       | 5.16          |
| 12              | 518.5  | 0.6425±0.0016 | 10.2       | 5.53          |
| 14              | 522.5  | 0.6384±0.0026 | 6.2        | 6.88          |
| 16              | 515    | 0.6596±0.0009 | 13.7       | 4.75          |
| 18              | 521.5  | 0.6524±0.0008 | 7.2        | 6.5           |
| 20              | 521    | 0.6587        | 7.8        | 6.3           |

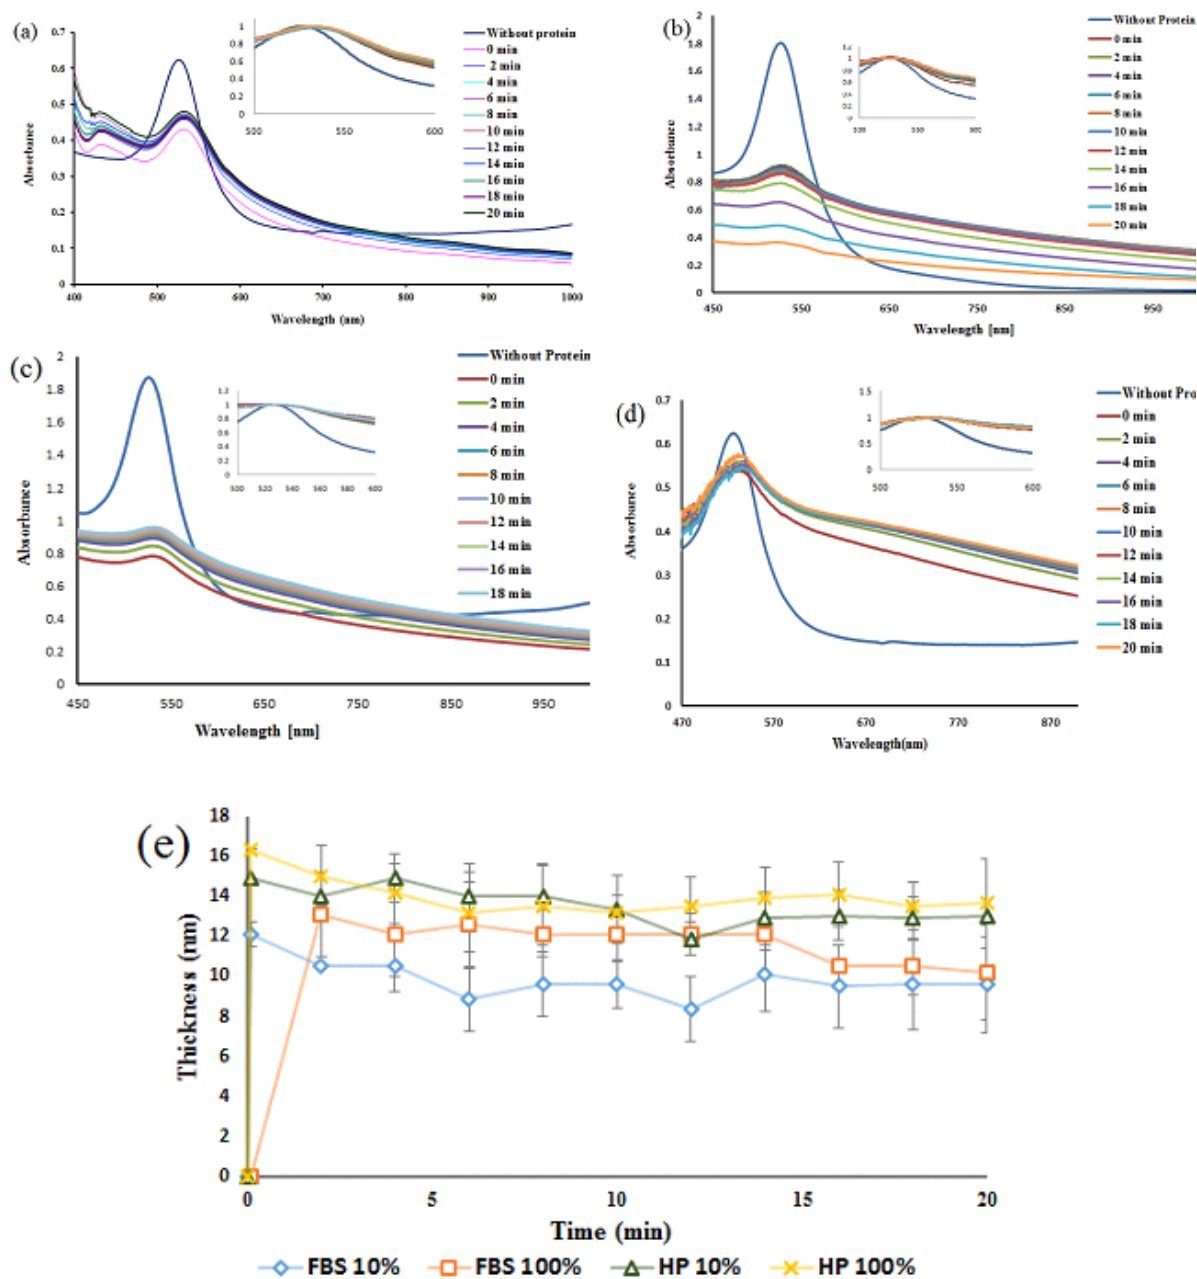

**Figure S1.** SPR spectra of the protein–nanoparticles bioconjugates, obtained from incubation of Small Sphere (20 nm) GNPs with various protein sources ((a) FBS 10%, (b) FBS 100%), (c) HP 10%, (d) HP 100%) at different incubation times and (e) their calculated protein corona thicknesses.

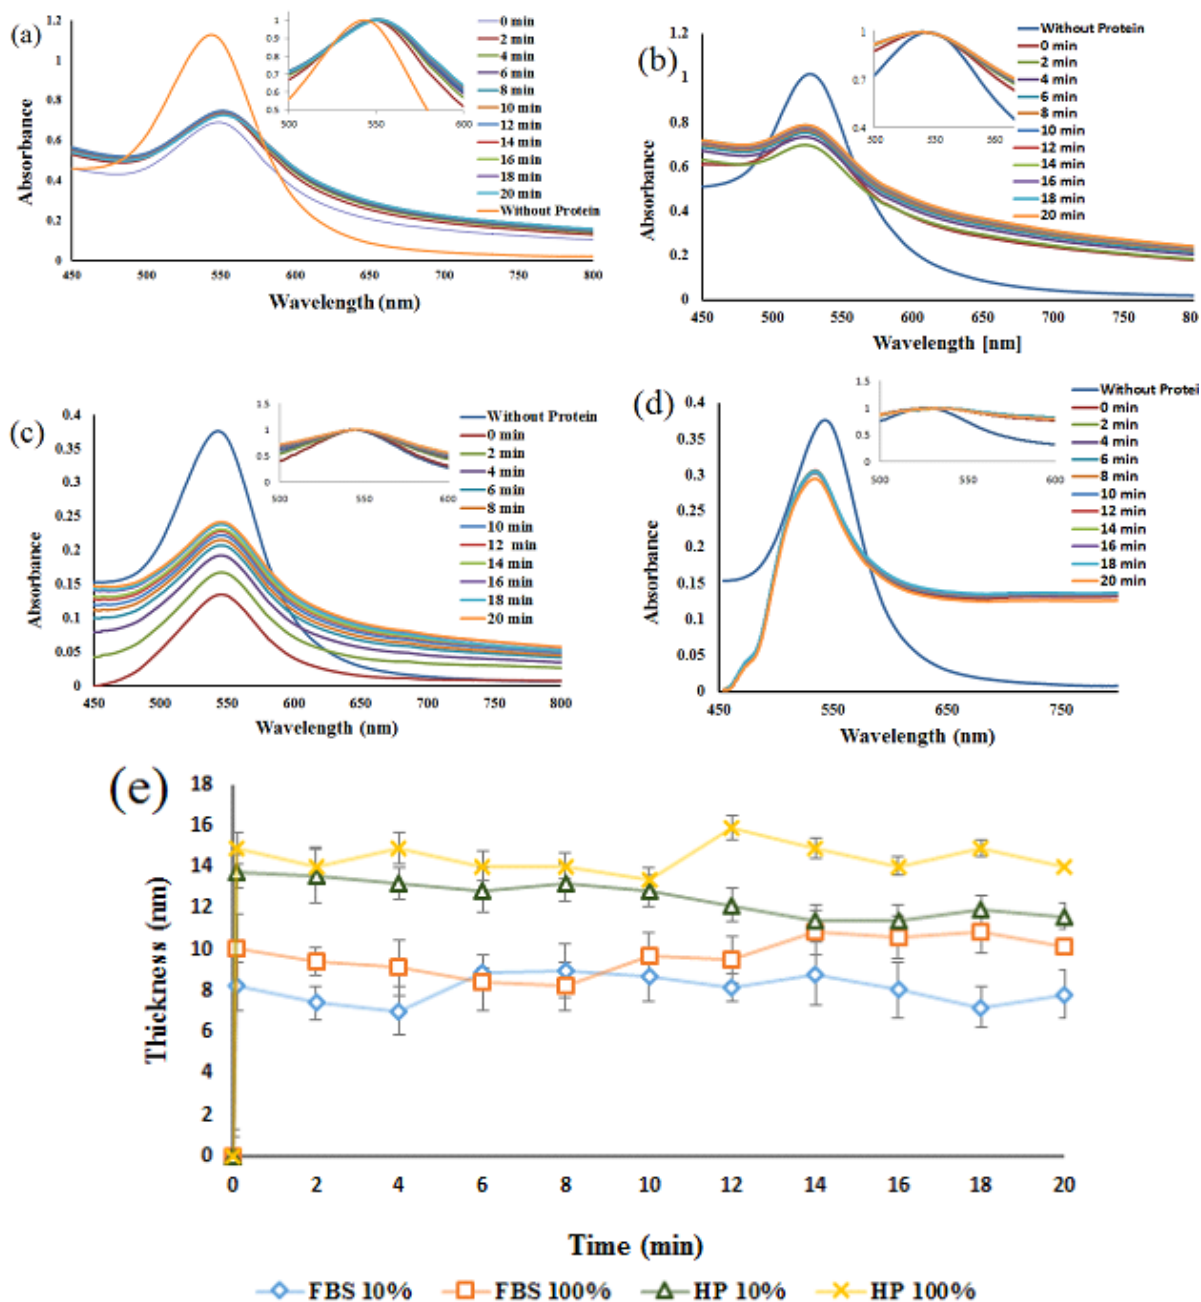

**Figure S2.** SPR spectra of the protein–nanoparticles bioconjugates, obtained from incubation of Big Sphere (30 nm) GNPs with various protein sources ((a) FBS 10%, (b) FBS 100%), (c) HP 10%, (d) HP 100%) at different incubation times and (e) their calculated protein corona thicknesses.

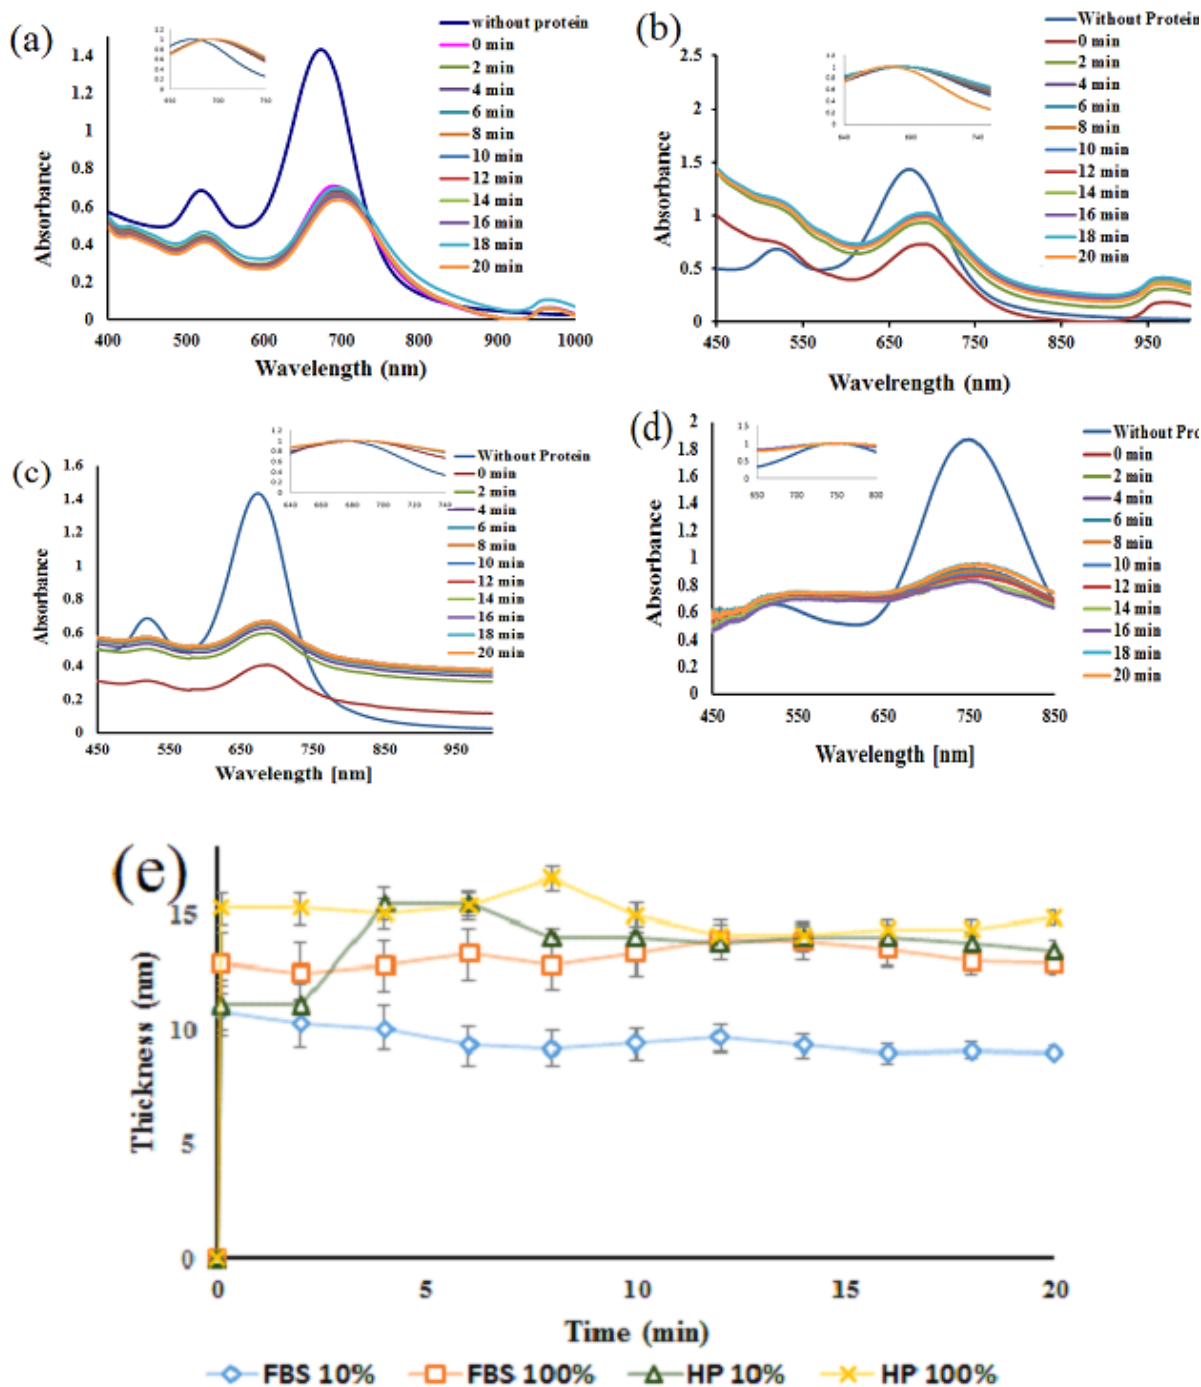

**Figure S3.** SPR spectra of the protein–nanoparticles bioconjugates, obtained from incubation of Short Rods (AR~4) GNPs with various protein sources ((a) FBS 10%, (b) FBS 100%), (c) HP 10%, (d) HP 100%) at different incubation times and (e) their calculated protein corona thicknesses.

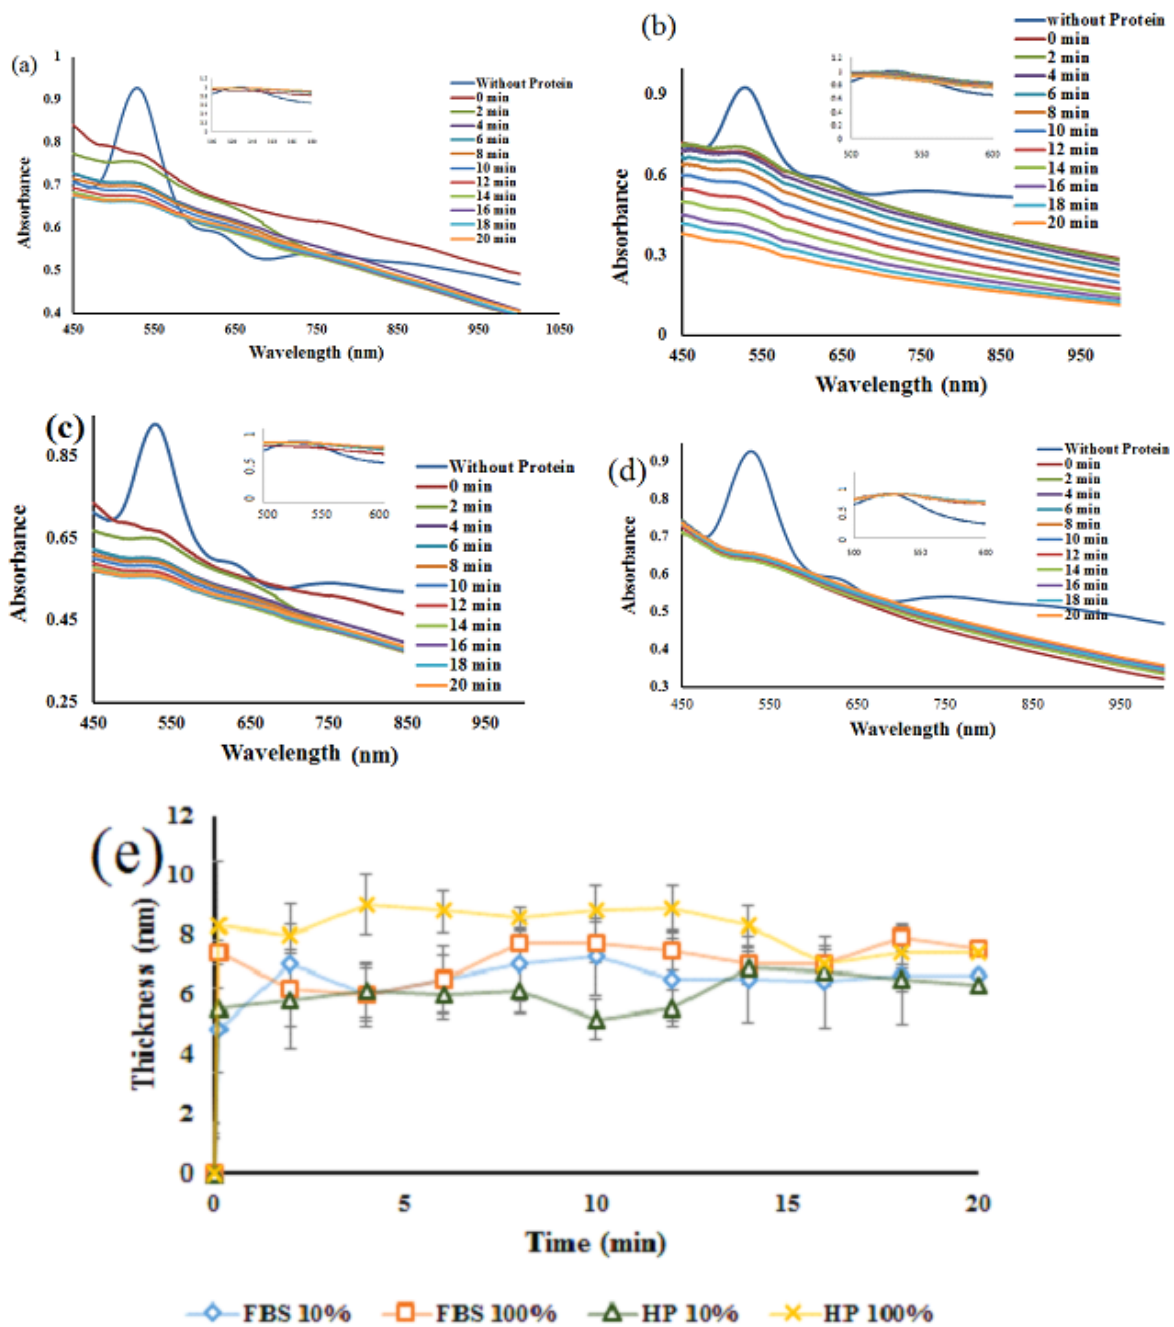

**Figure S4.** SPR spectra of the protein–nanoparticles bioconjugates, obtained from incubation of Long Rods (AR~20) GNPs with various protein sources ((a) FBS 10%, (b) FBS 100%), (c) HP 10%, (d) HP 100%) at different incubation times and (e) their calculated protein corona thicknesses.

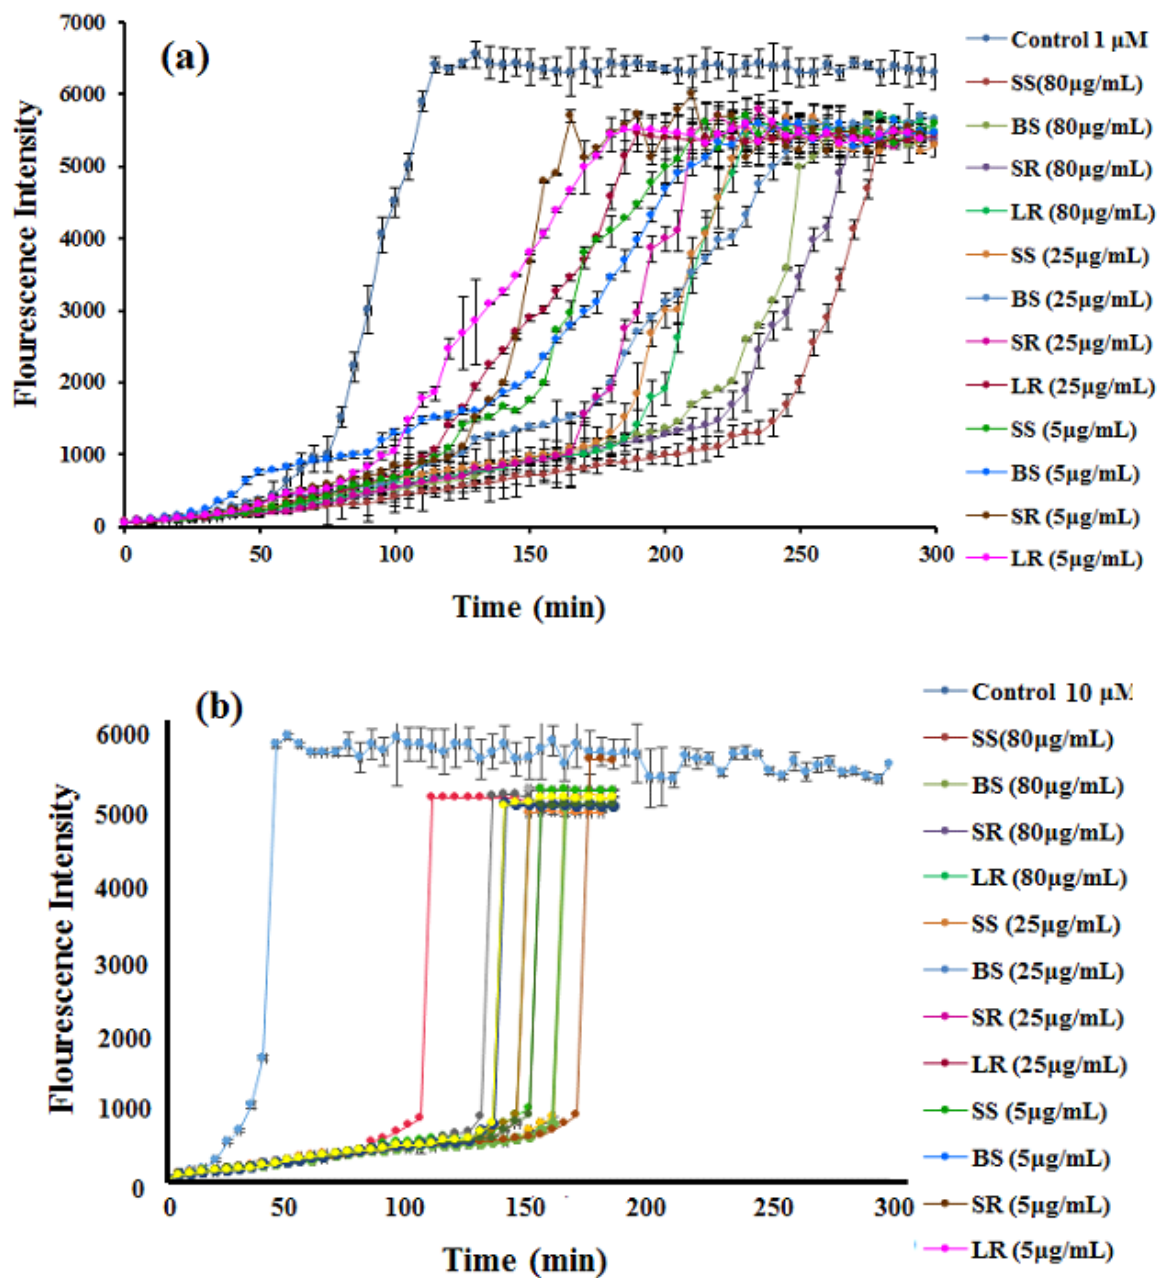

**Figure S5.** Kinetics of Aβ fibrillation in presence of NMs A) Fibrillation kinetics of Aβ (1μM), B) Fibrillation kinetics of Aβ (10μM).

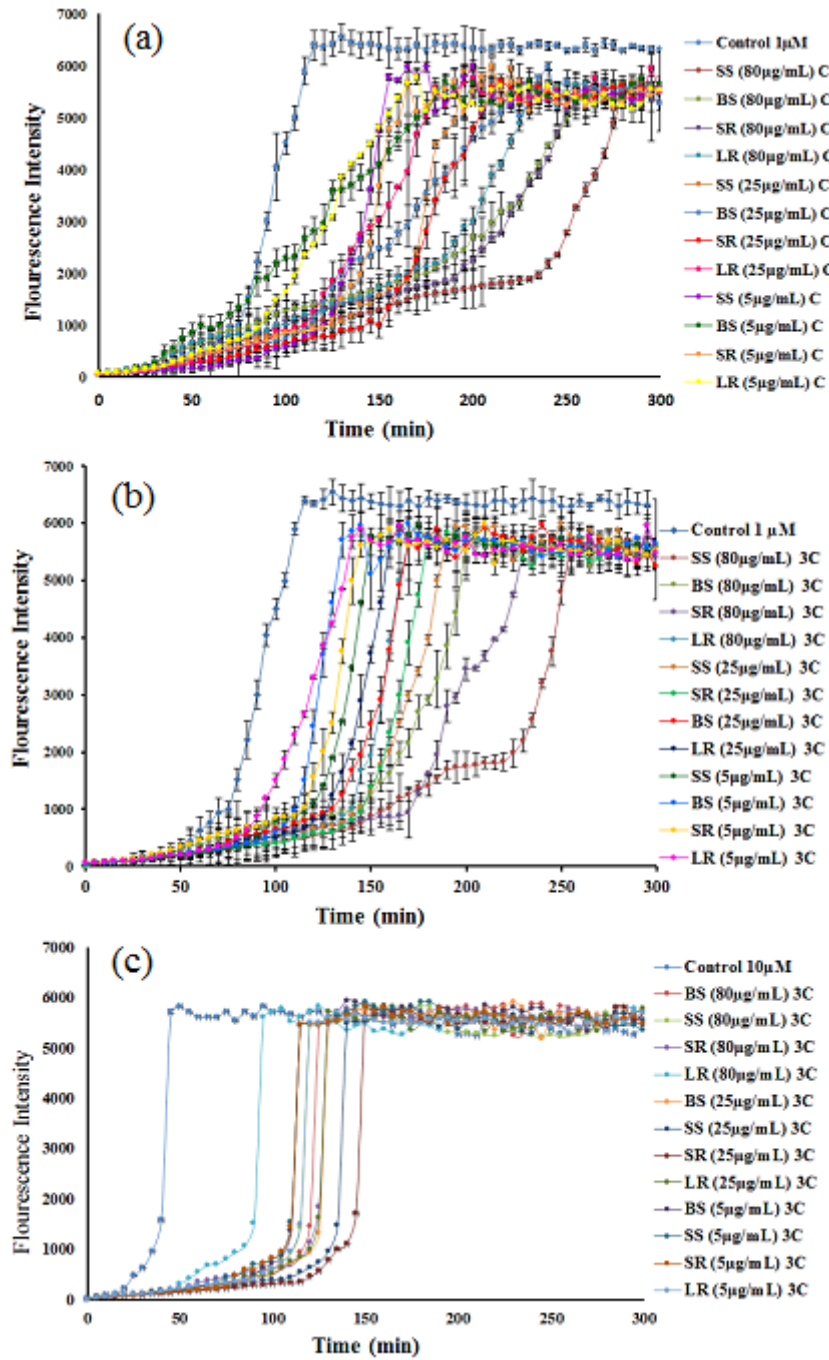

**Figure S6.** Kinetics of Aβ fibrillation in presence of NMs a) Fibrillation kinetics of Aβ (1 μM) and GNPs with one centrifuge (1C) , b) Fibrillation kinetics of Aβ (1 μM) thrice centrifuge (3C) and c) Fibrillation kinetics of Aβ (10 μM) thrice centrifuge (3C).





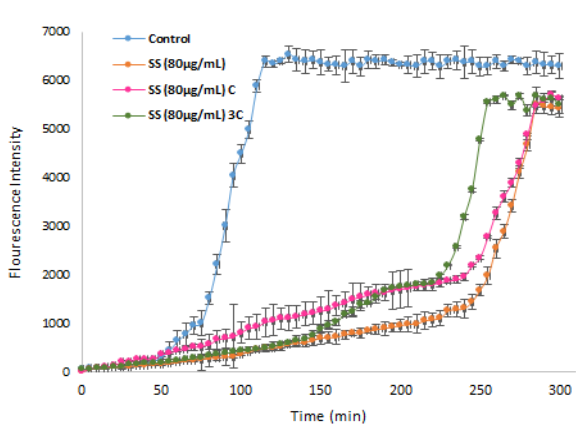

a) Lag time (1C):167, (3C):134 min

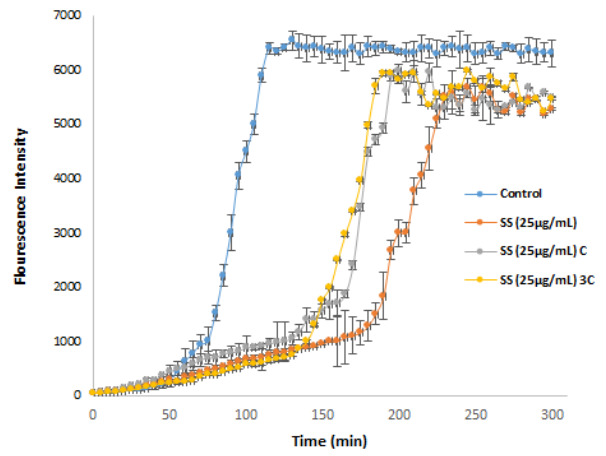

b) Lag time (1C) 135, (3C):130 min

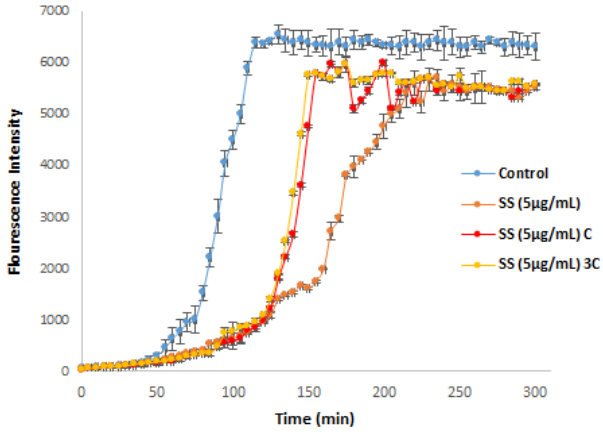

c) Lag time (1C) 120, (3C) 117 min

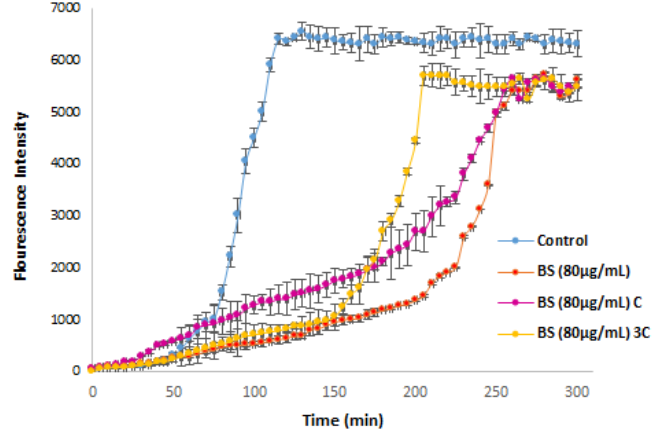

d) Lag time (1C) 136, (3C) 96 min

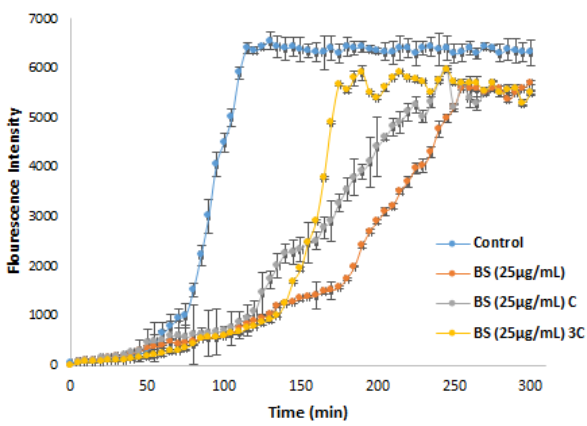

E) Lag time (1C) 127, (3C) 92 min

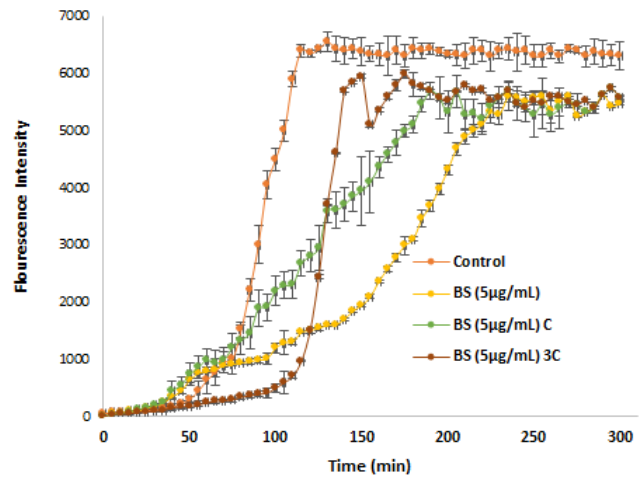

F) Lag time (1C) 83, (3C)81 min

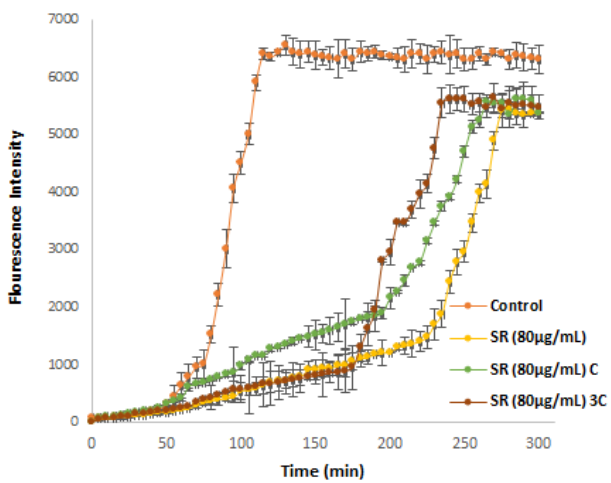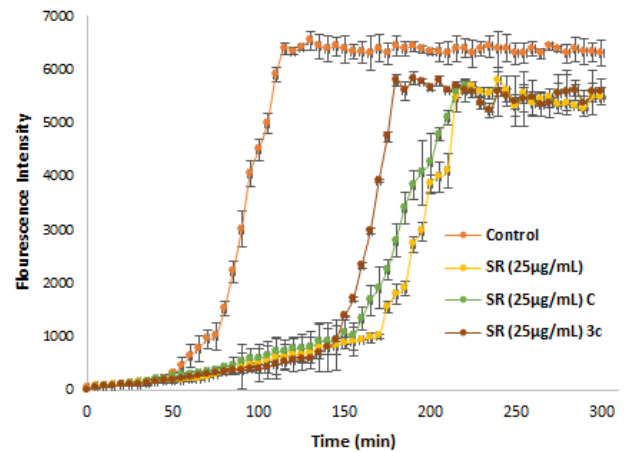

G) Lag time (1C) 153, (3C) 114 min

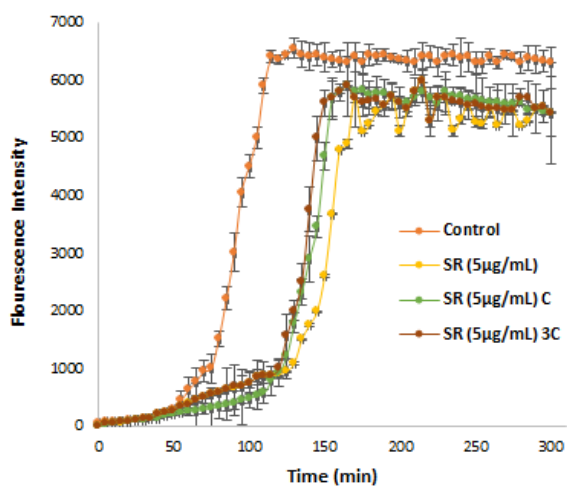

H) Lag time (1C) 138, (3C) 135 min

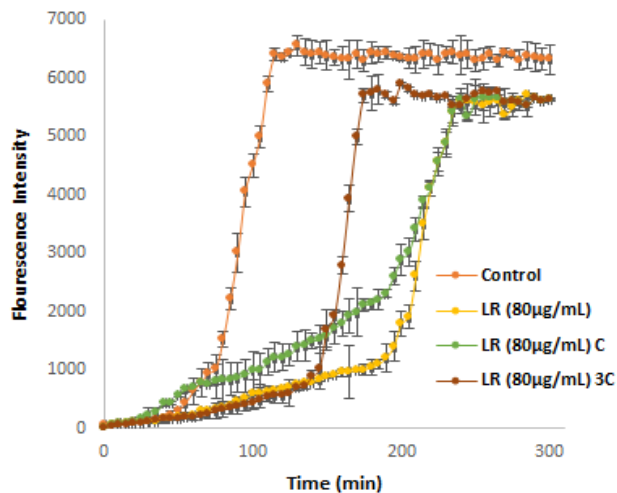

I) Lag time (1C) 114, (3C) 112 min

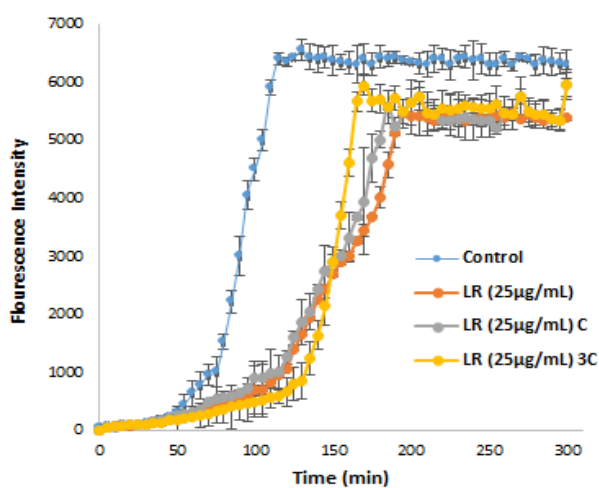

J) Lag time (1C) 137, (3C) 114 min

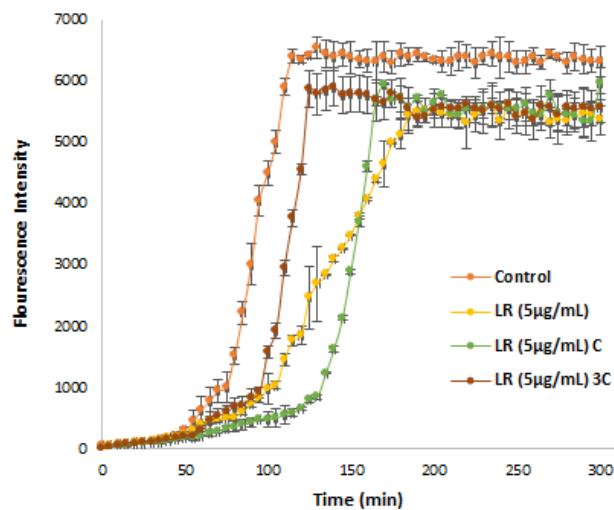

K) Lag time (1C) 125, (3C) 98 min

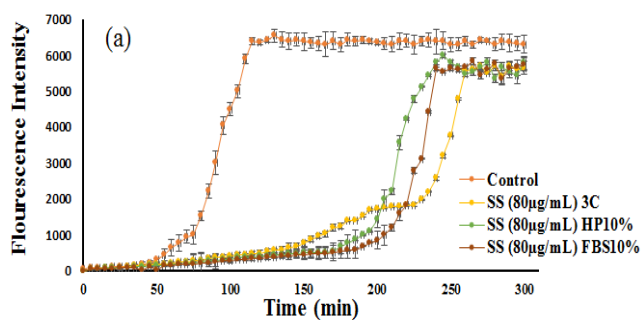

L) Lag time (1C) 125, (3C) 87 min

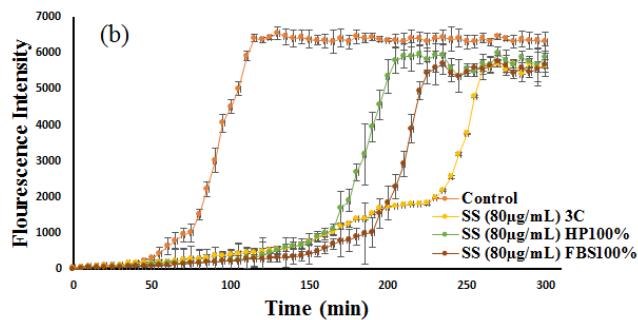

**Figure S7.** Kinetic of A $\beta$  fibrillation (1 $\mu$ M) on bare GNPs (once and thrice centrifuge). A, B, C) Small Spheres, D, E, F) Big Spheres, G, H, I) Short Rods and J, K, L) Long Rods.

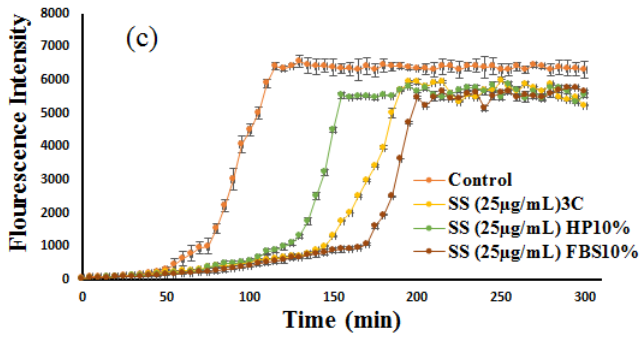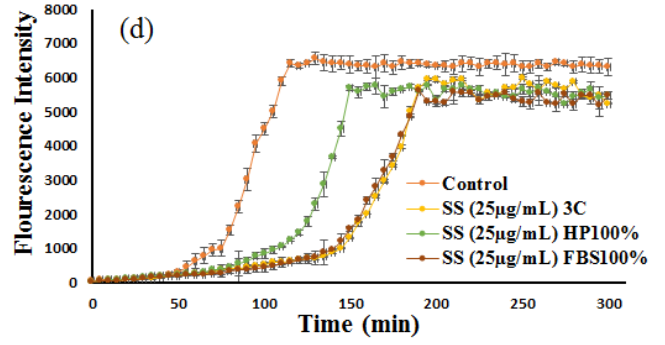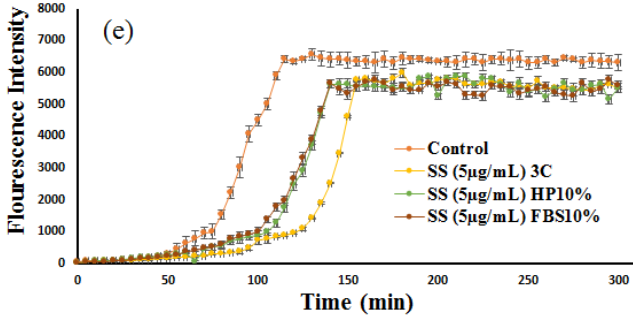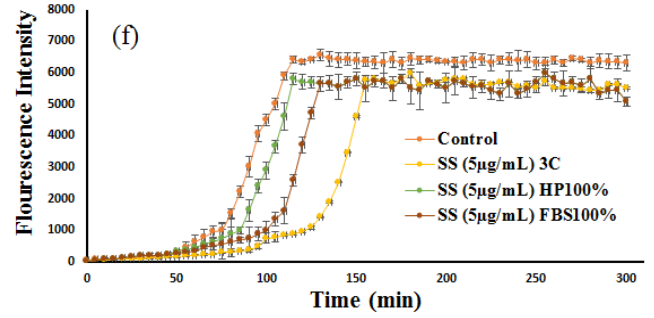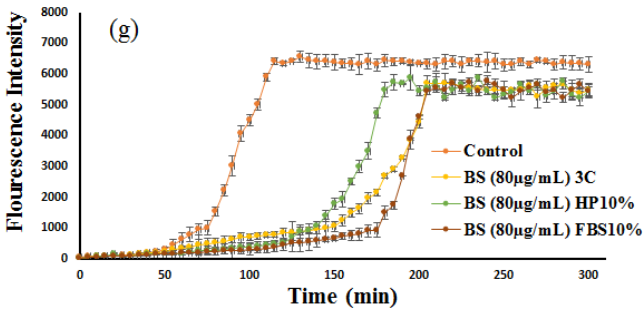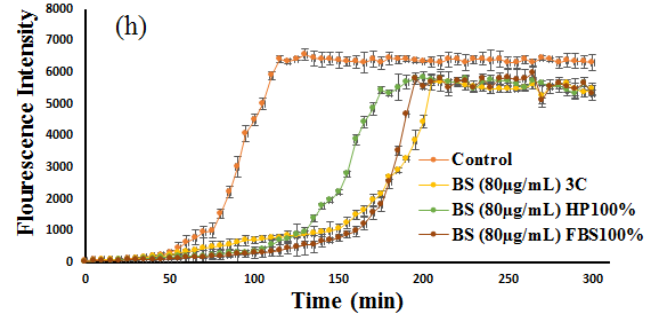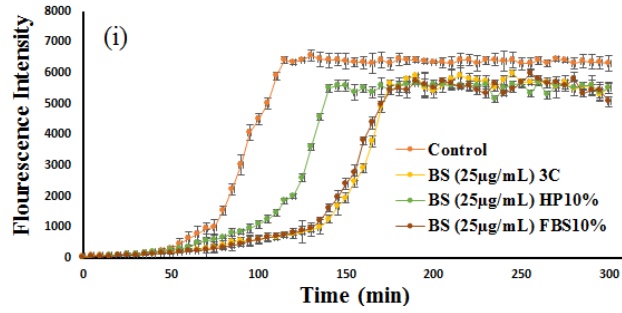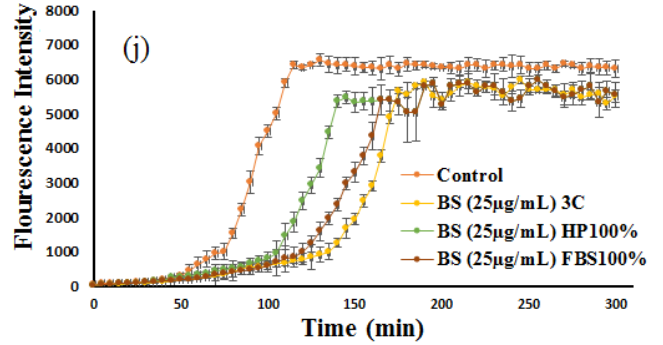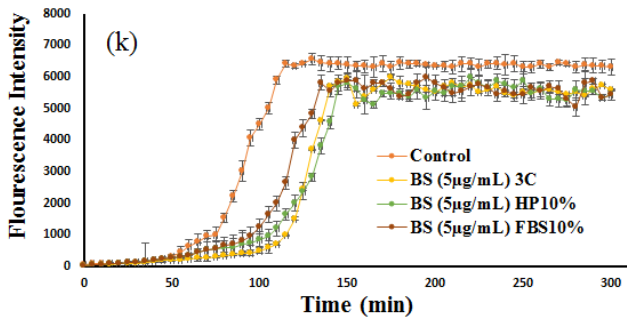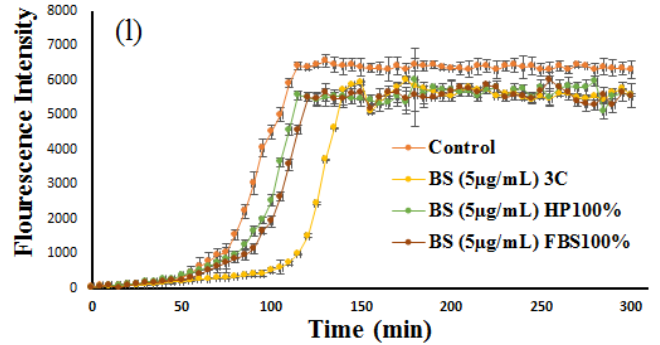

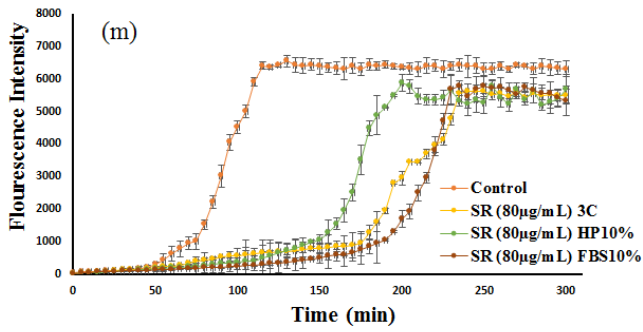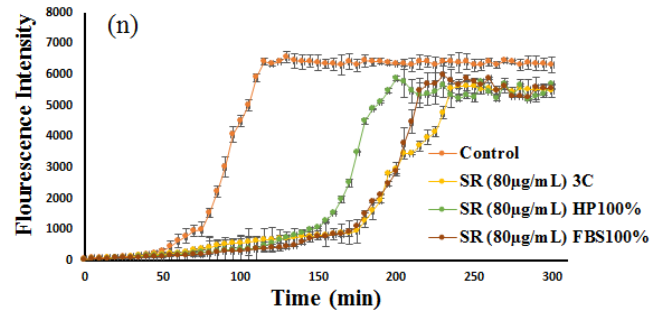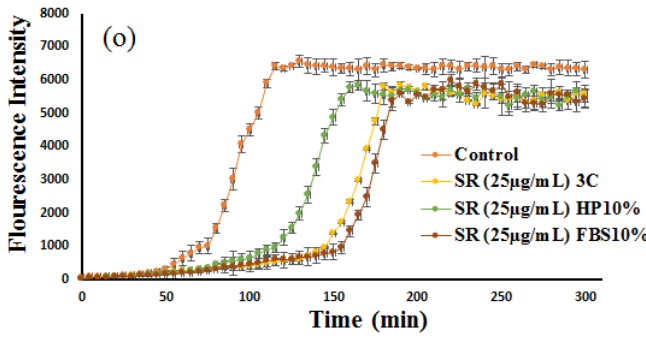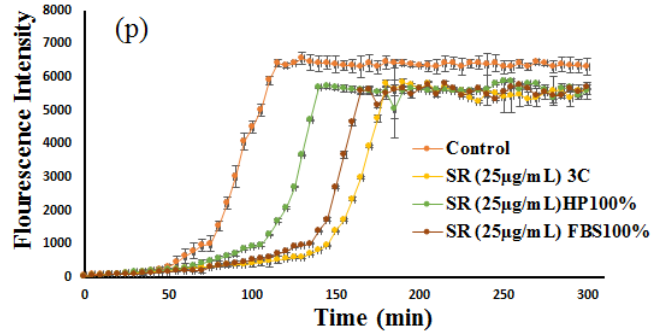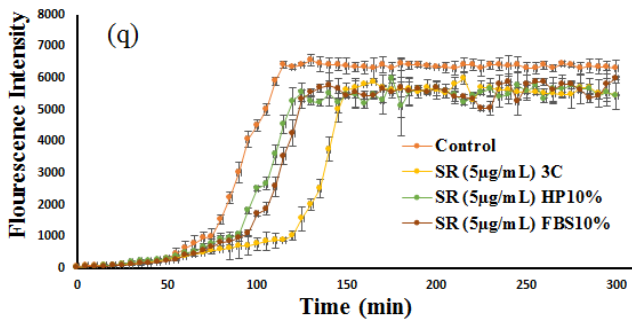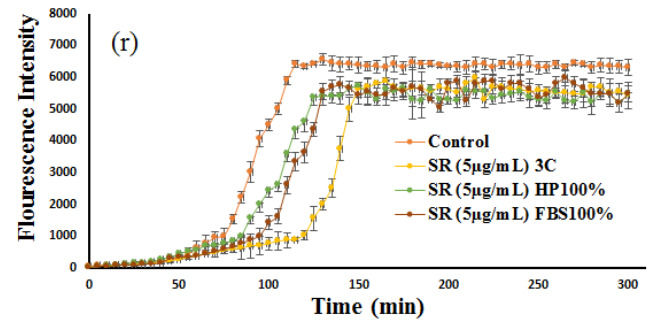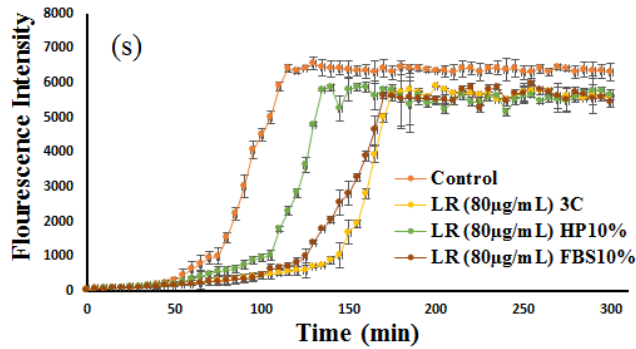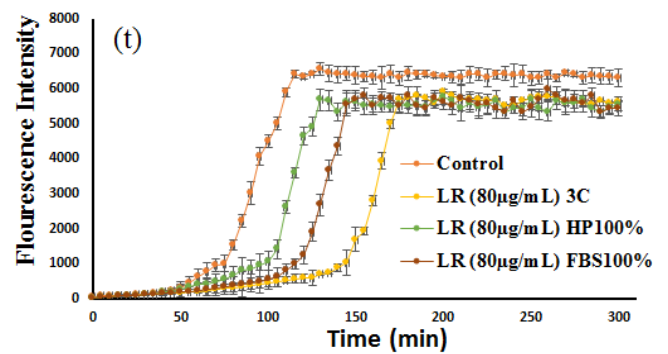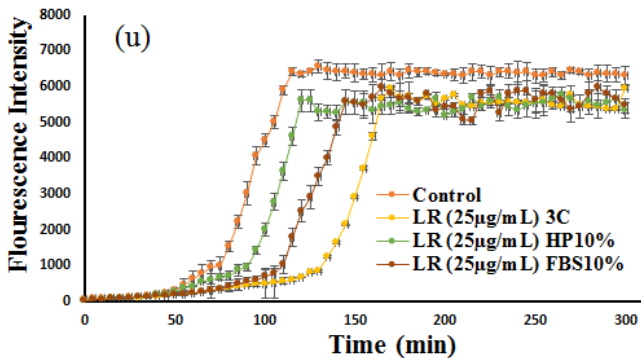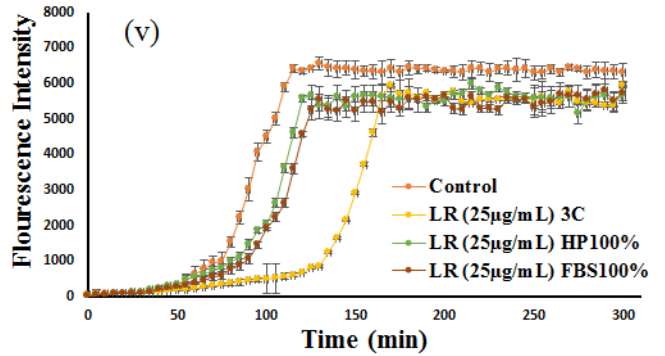

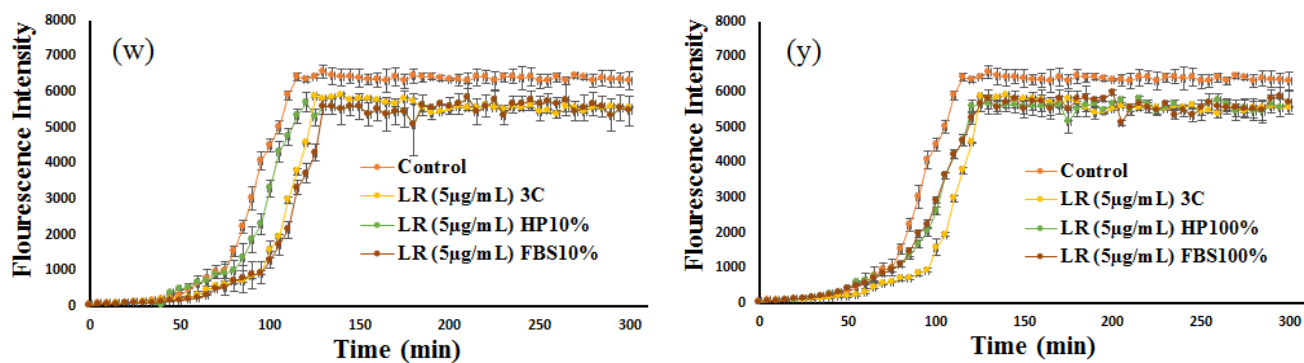

**Figure S8.** Kinetic of A $\beta$  fibrillation (1  $\mu$ M) on bare GNPs (thrice centrifuge). a, b, c, d, e, f)

Small Spheres, g, h, I, j, k, l) Big Spheres, m, n, o, p, q, r) Short Rods and s, t, u, v, w, y)

Long Rods.

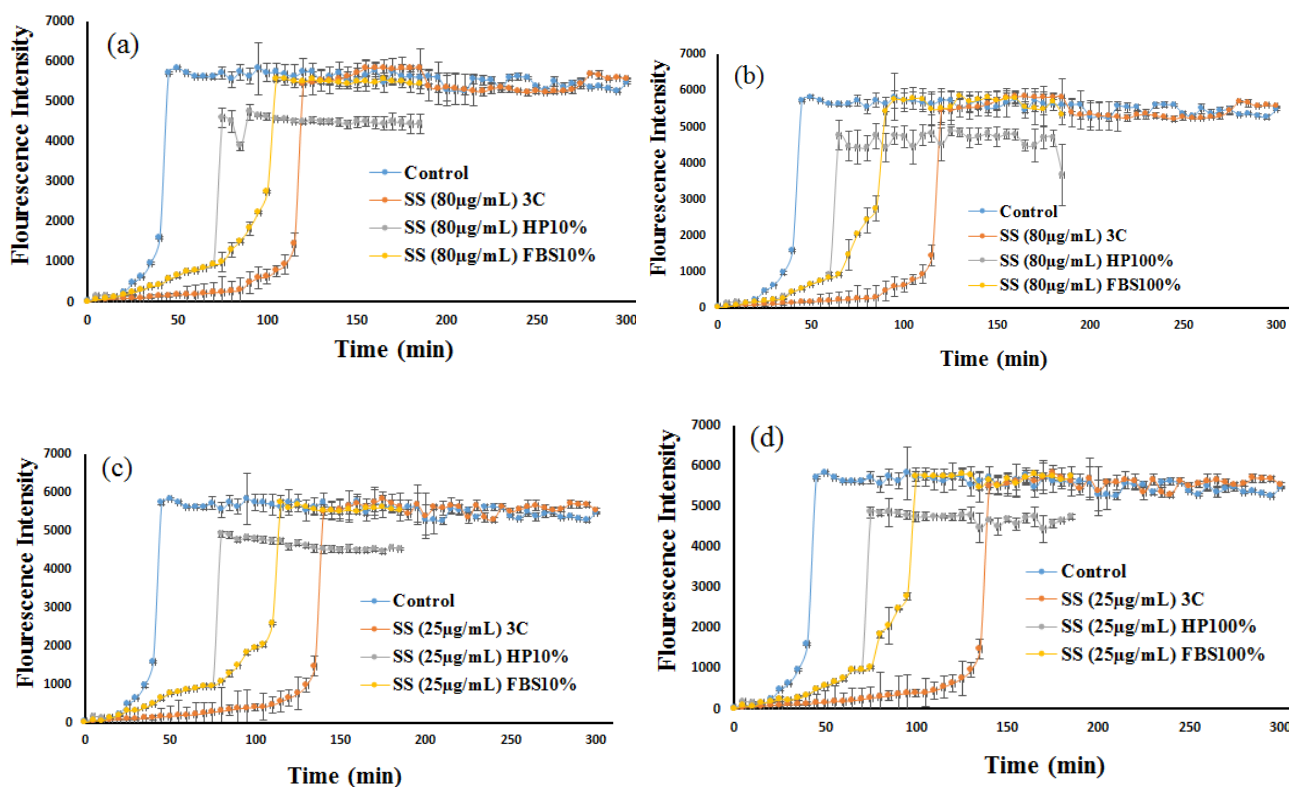

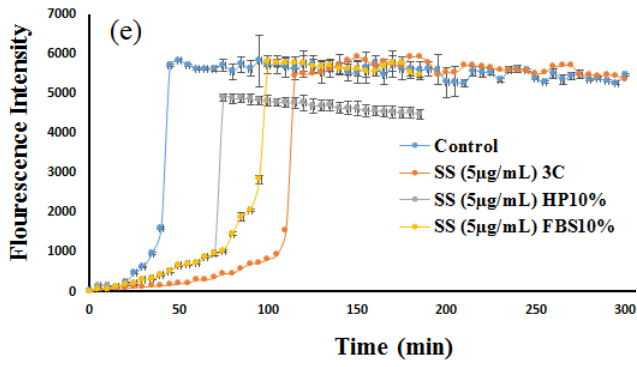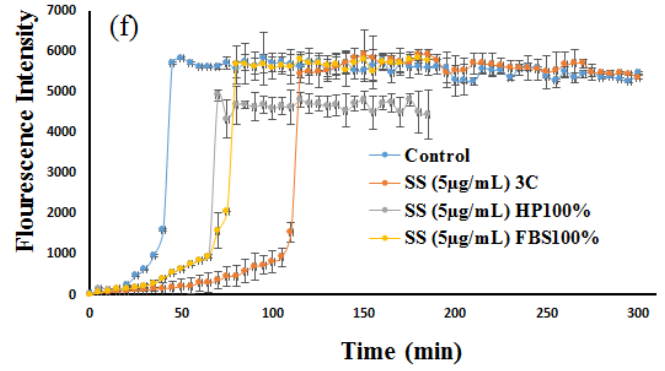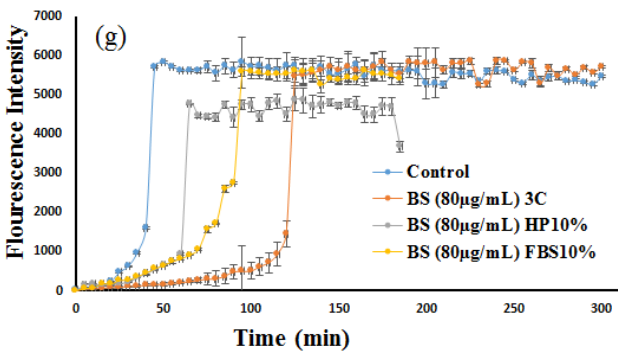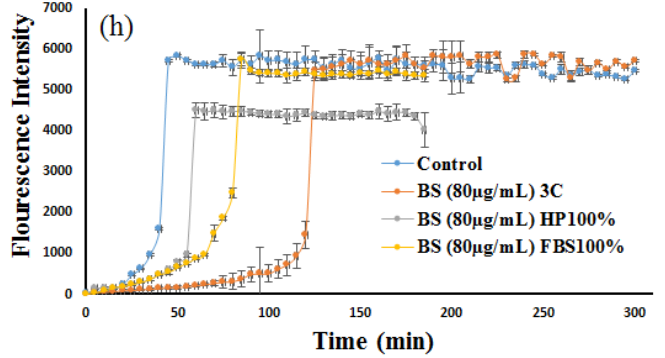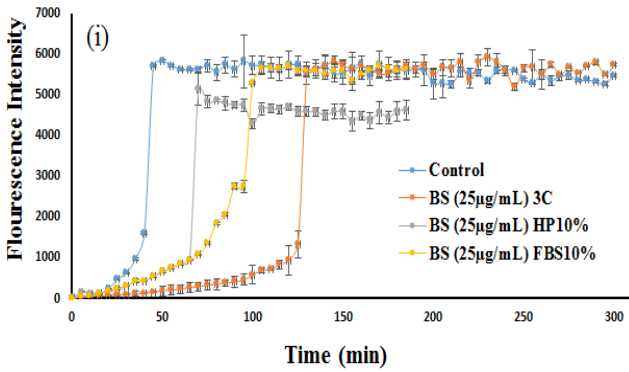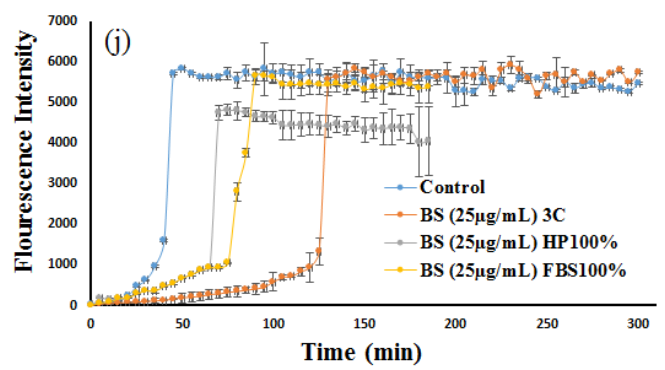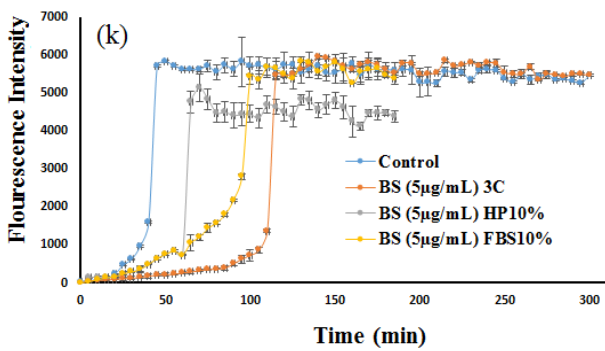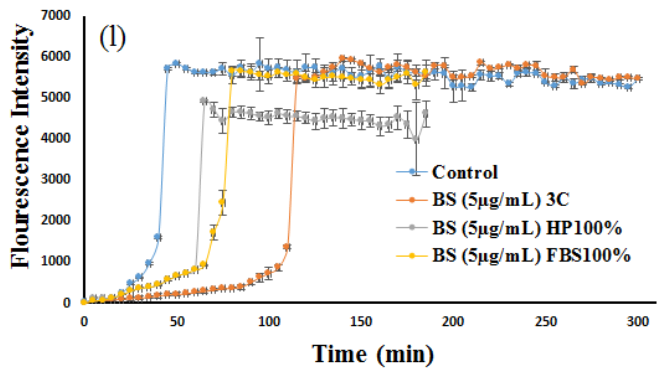





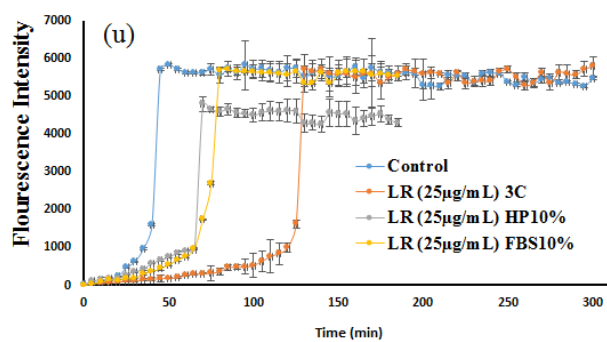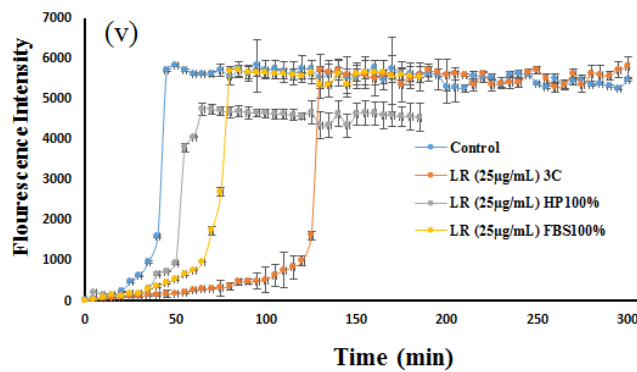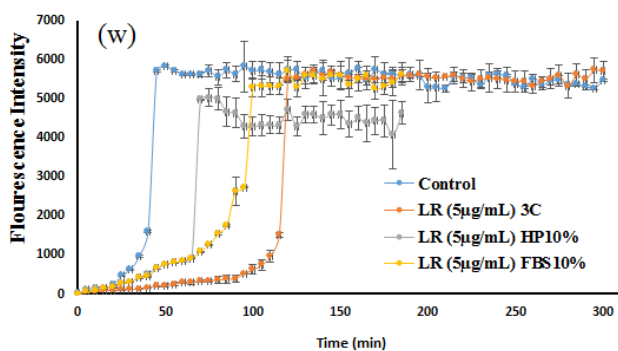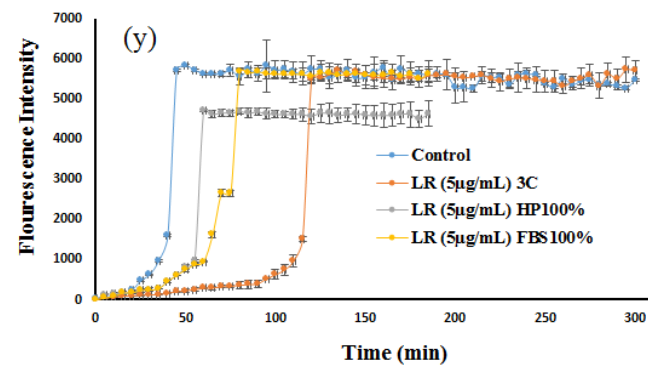

**Figure S9.** Kinetic of Aβ fibrillation (10µM) on bare GNPs (thrice centrifuge). a, b, c, d, e, f) Small Spheres, g, h, i, j, k, l) Big Spheres, m, n, o, p, q, r) Short Rods and s, t, u, v, w, y) Long Rods.

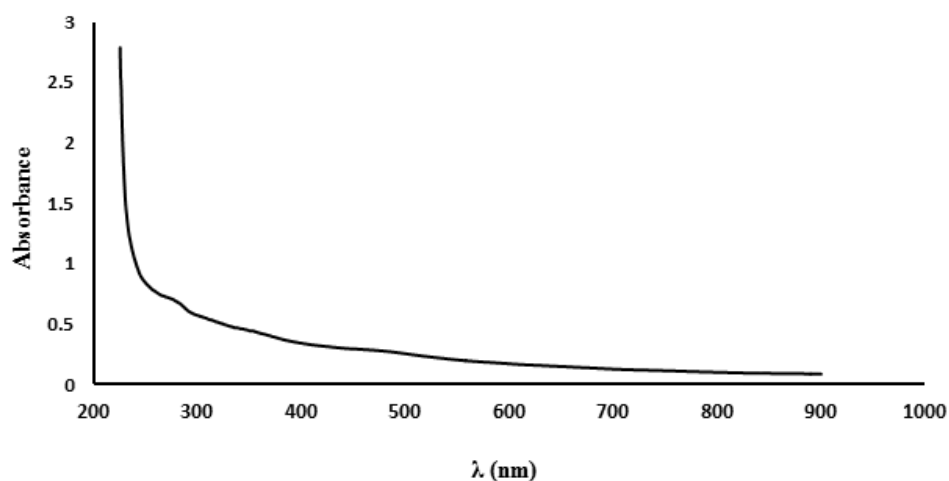

Figure S10. SPR of seeds

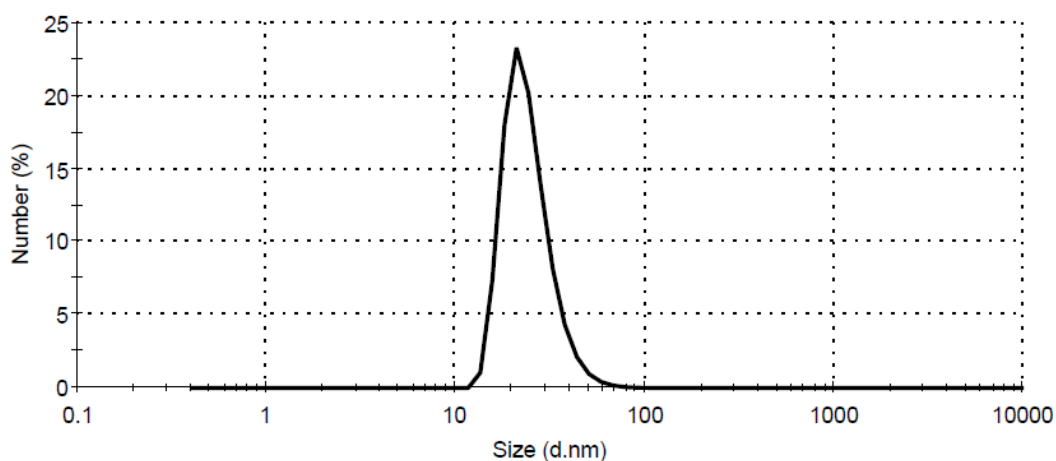

Figure S11. Size distribution function of 20 nm FBS10%-NP bioconjugates showing monodispersed population

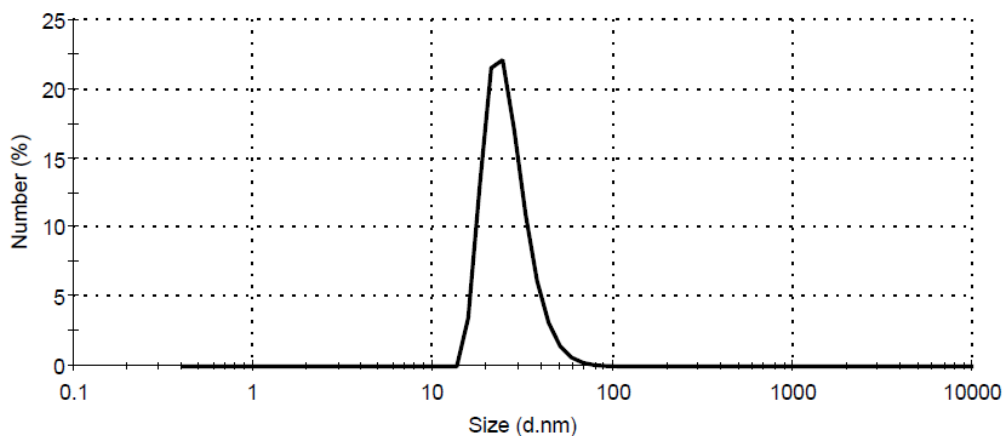

Figure S12. Size distribution function of 30 nm FBS10%-NP bioconjugates showing monodispersed population

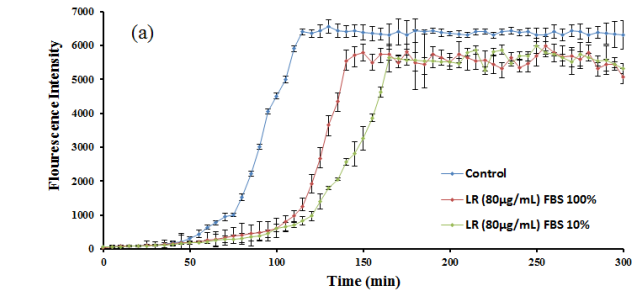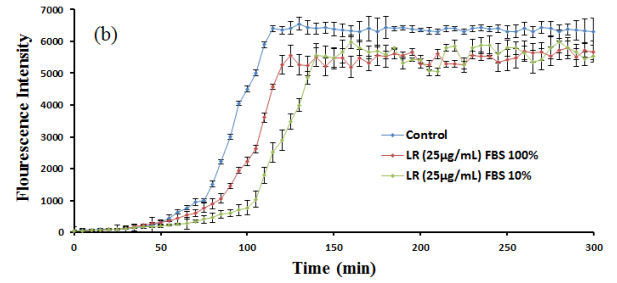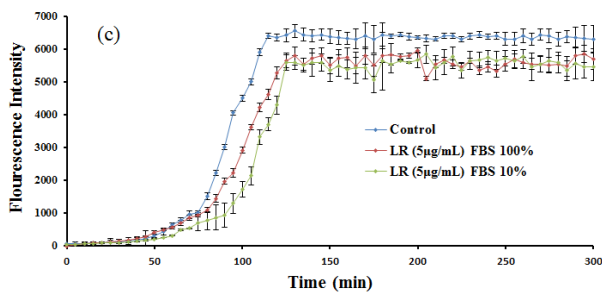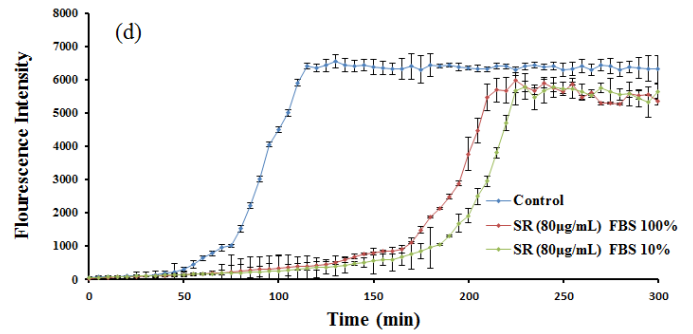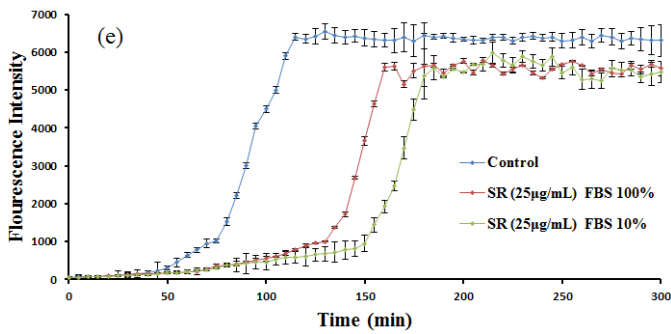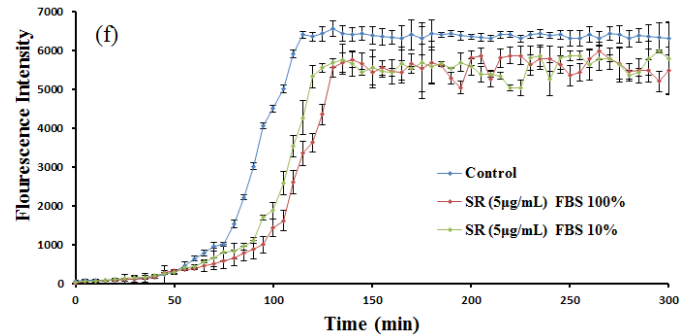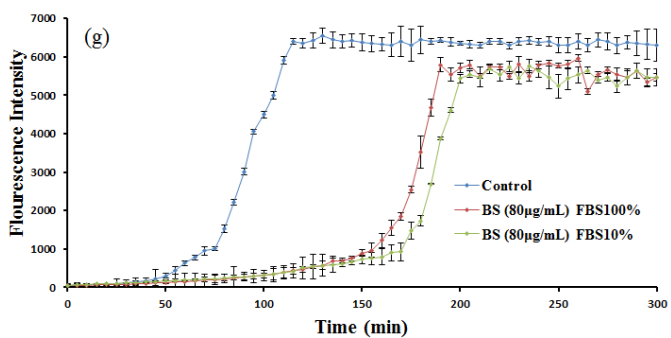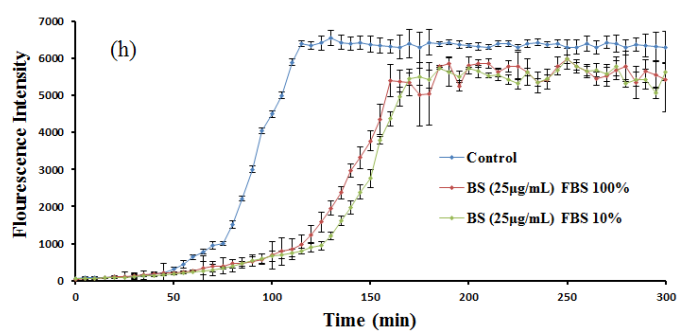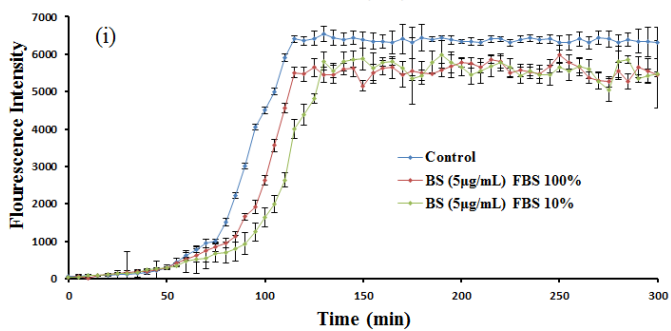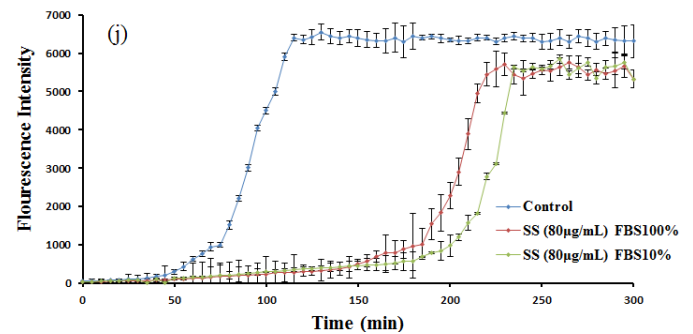

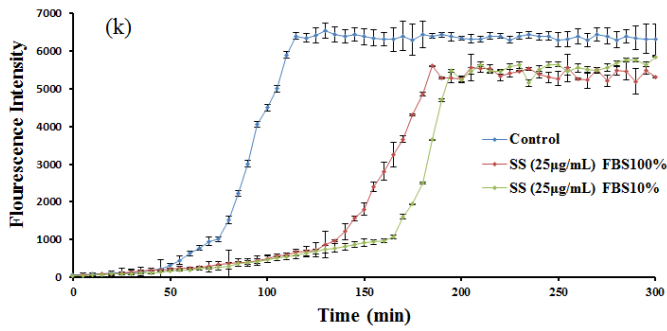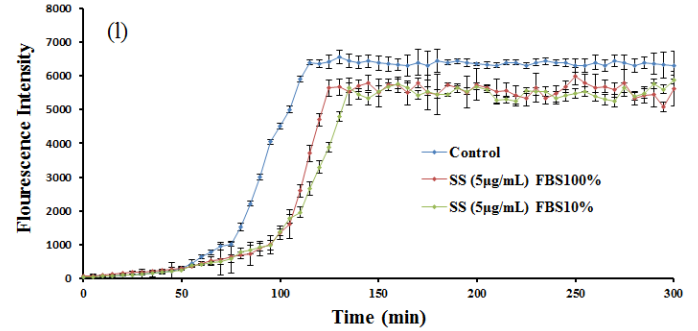

Fig. S13. Comparison between FBS 10% and FBS 100% for all of NPs concentration; (a, b, c) Long Rods, (d, e, f) Short Rods, (g, h, i) Small Spheres~20 nm and (j, k, l) Big Spheres~30 nm. A $\beta$  concentration is (1µM)

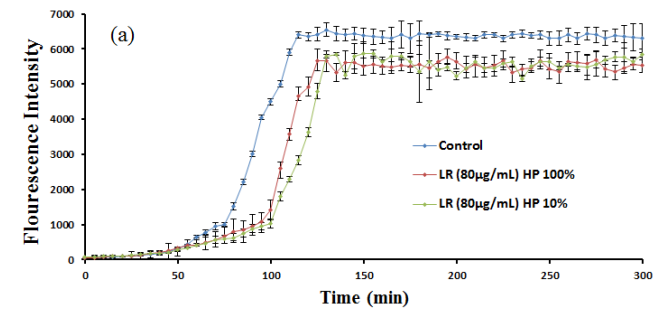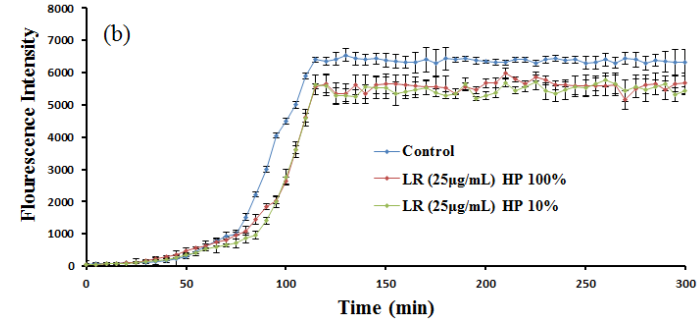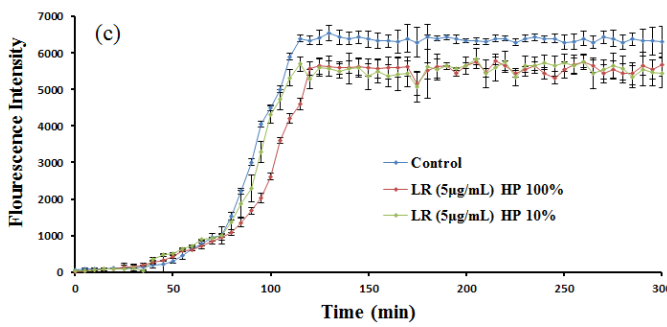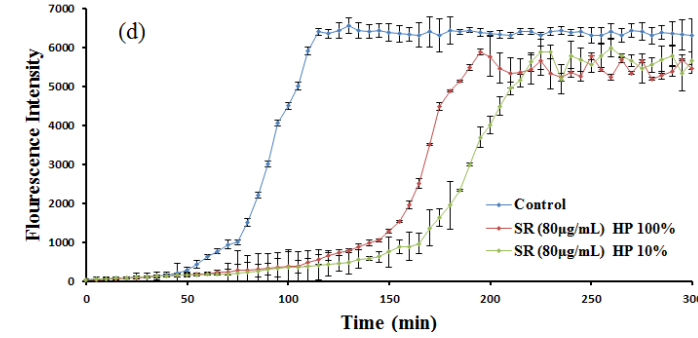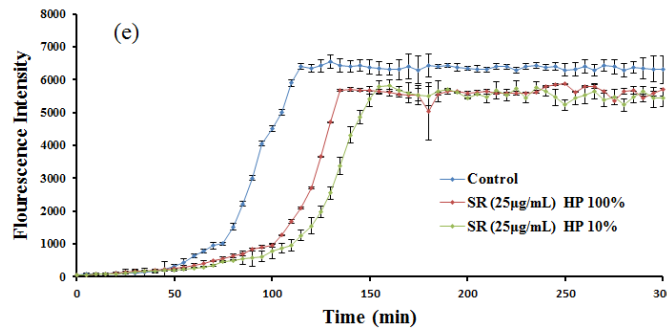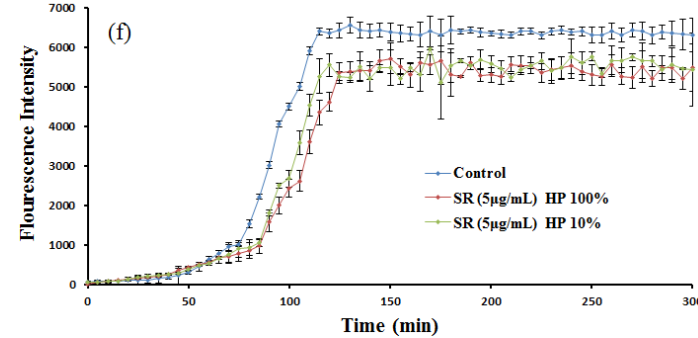

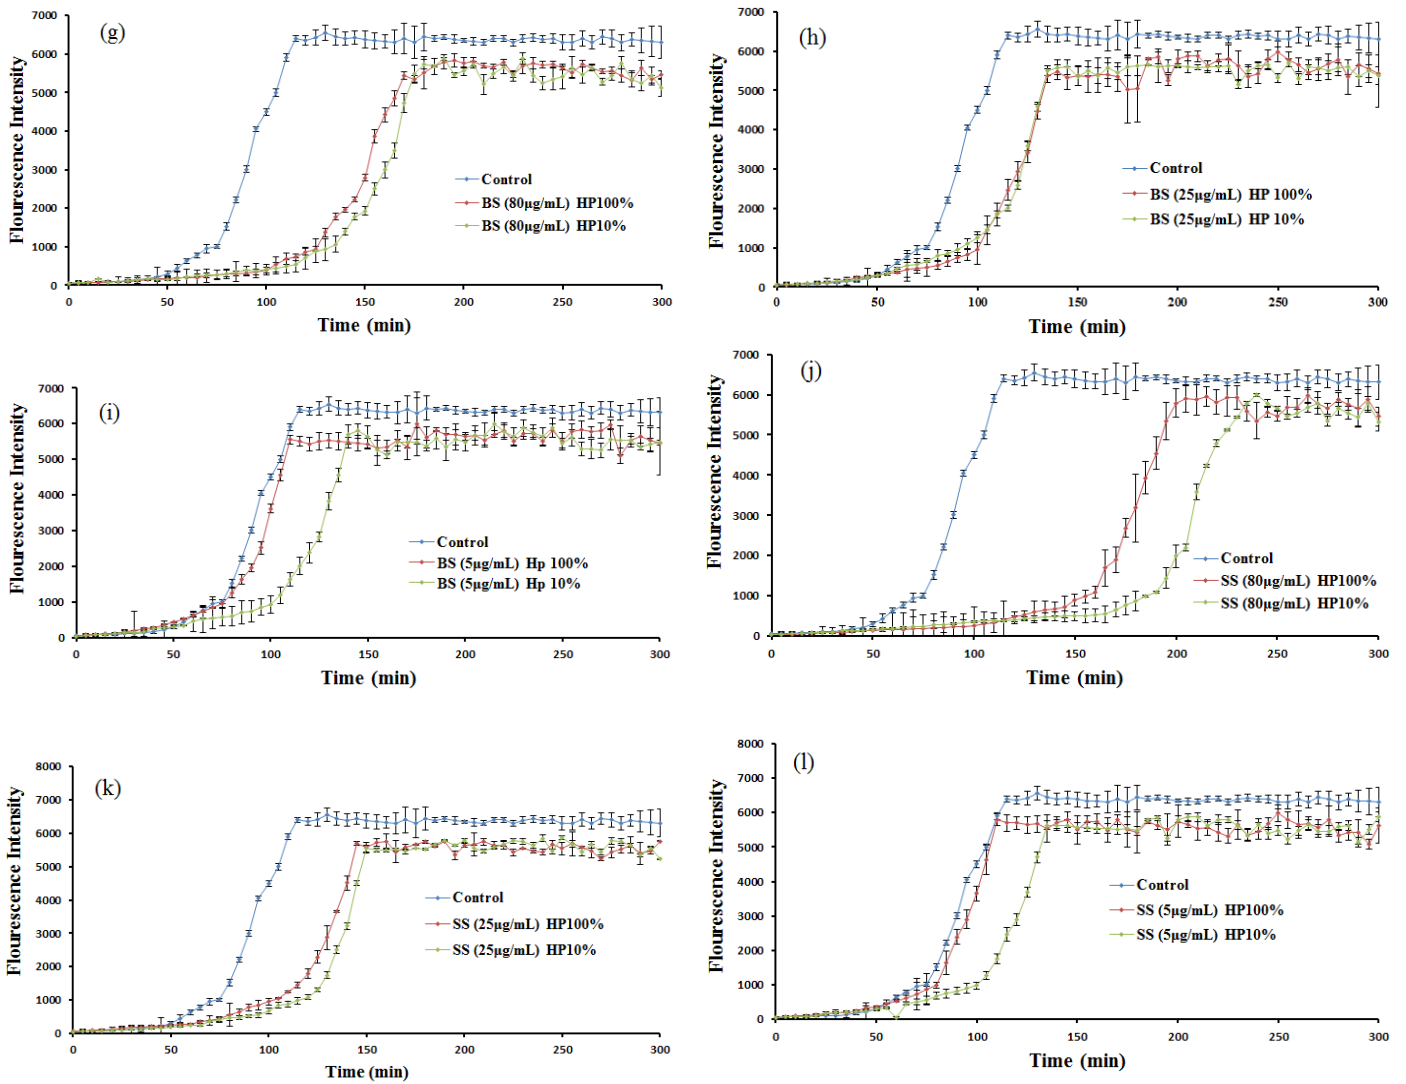

Fig S14. Comparison between HP 10% and HP 100% for all of NPs concentration; (a, b, c) Long Rods, (d, e, f) Short Rods, (g, h, i) Small Spheres~20 nm and (j, k, l) Big Spheres~30 nm. Aβ concentration is (1 μM)

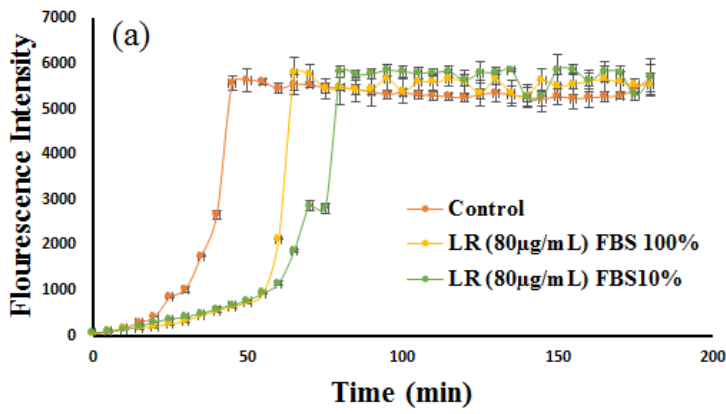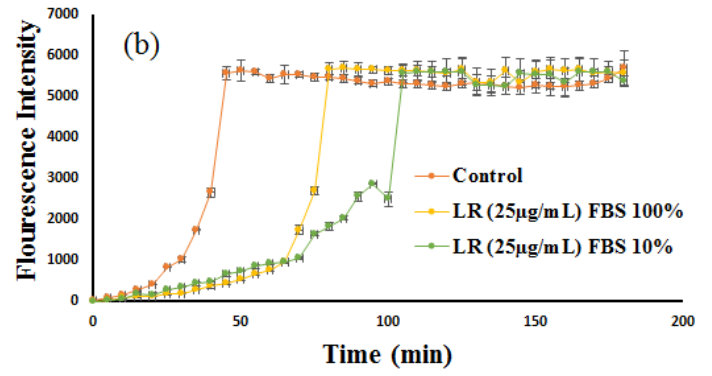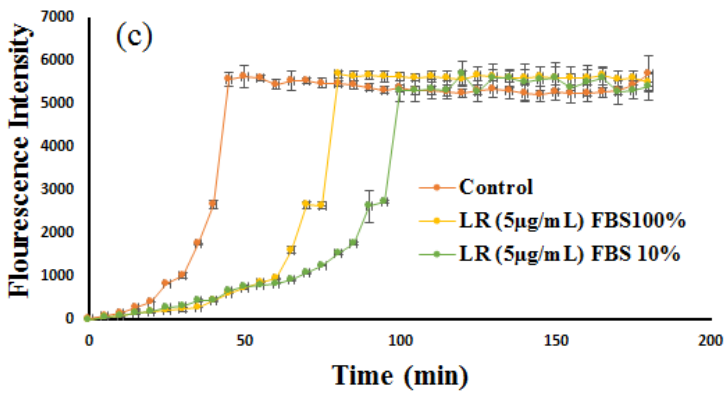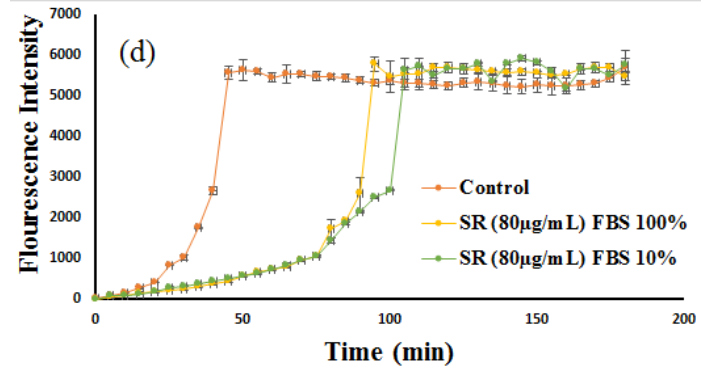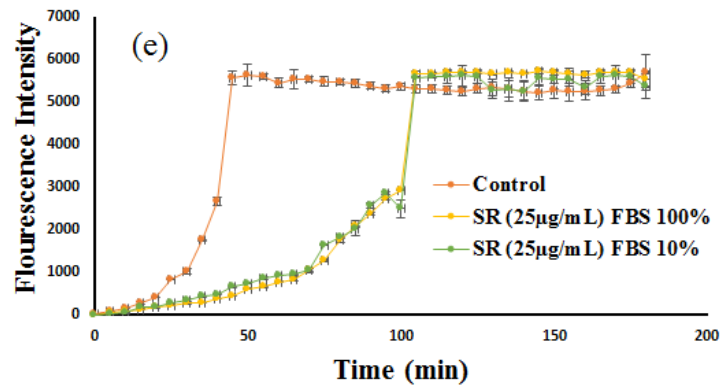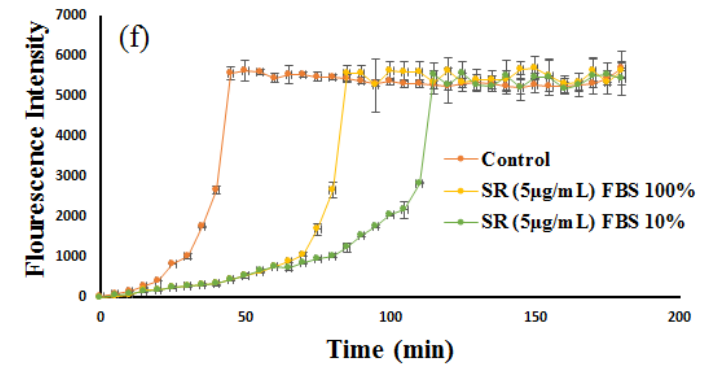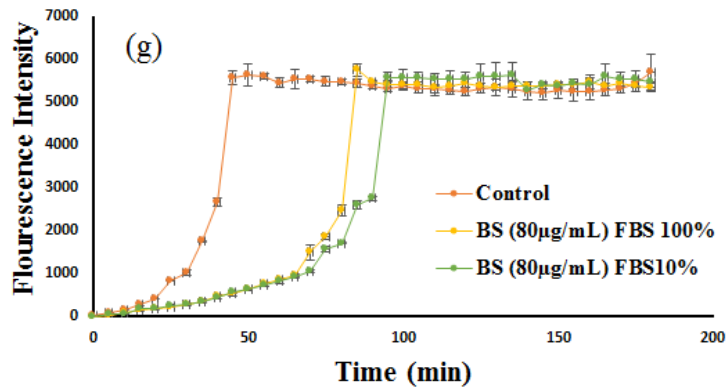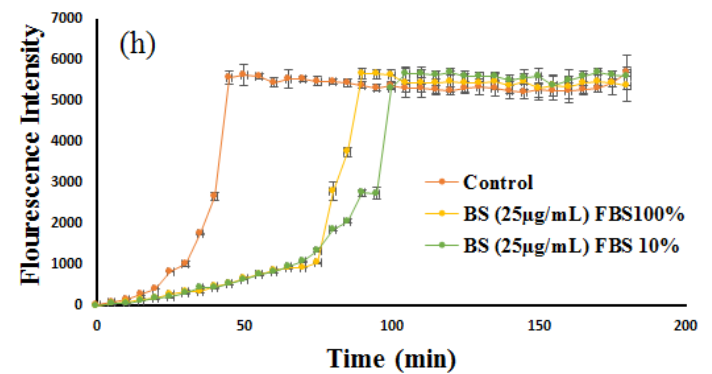

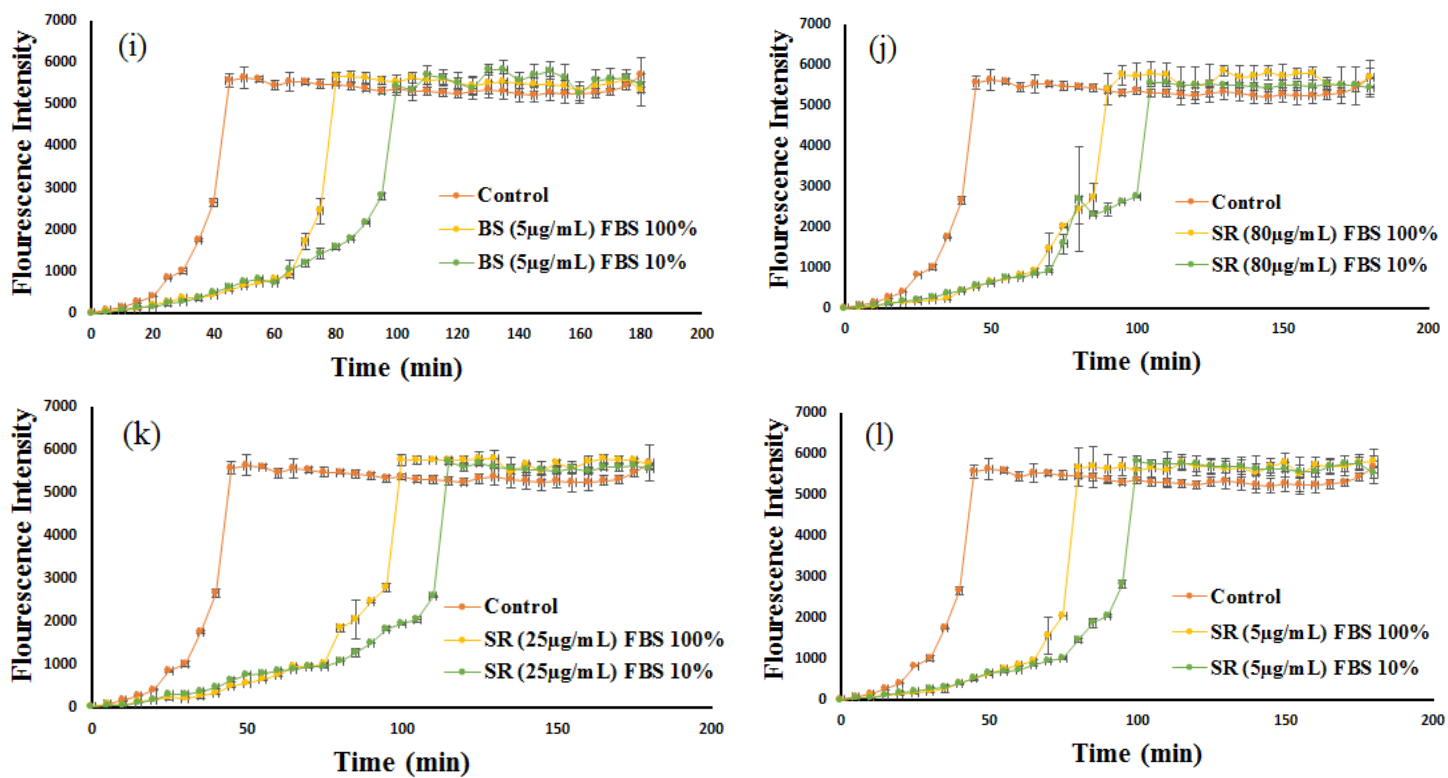

Fig. S15. Comparison between FBS 10% and FBS 100% for all of NPs concentration; (a, b, c) Long Rods, (d, e, f) Short Rods, (g, h, i) Small Spheres~20 nm and (j, k, l) Big Spheres~30 nm. A $\beta$  concentration is (10 μM)

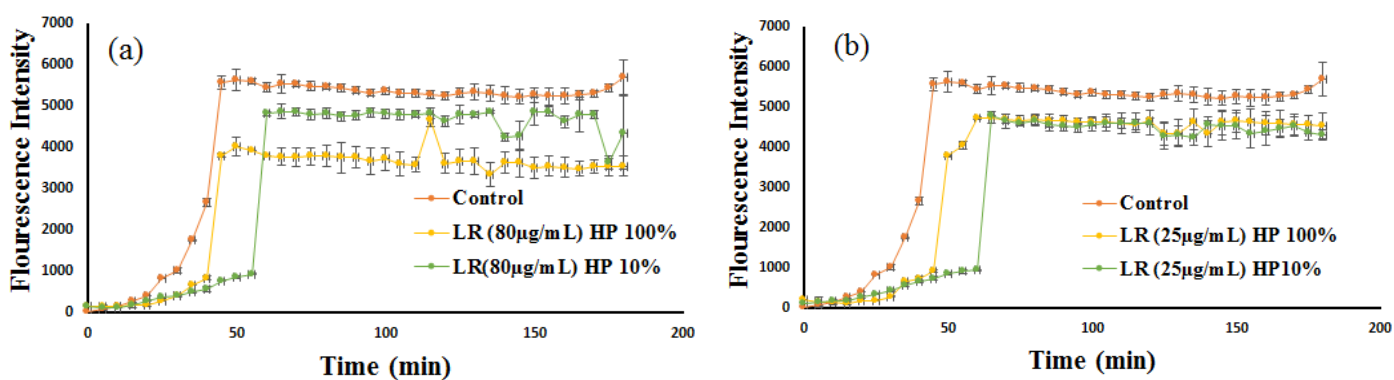

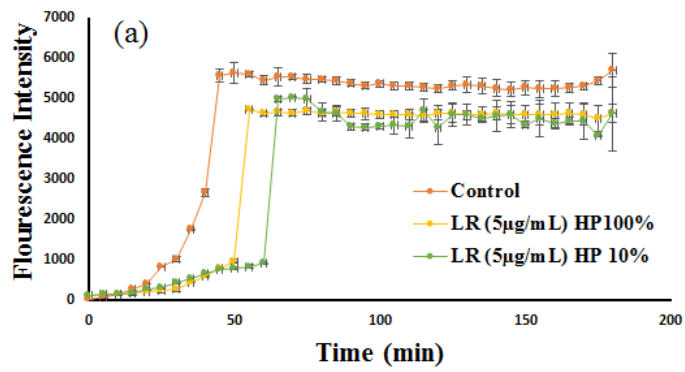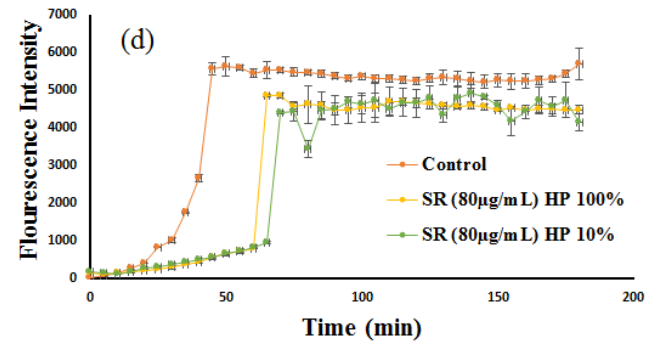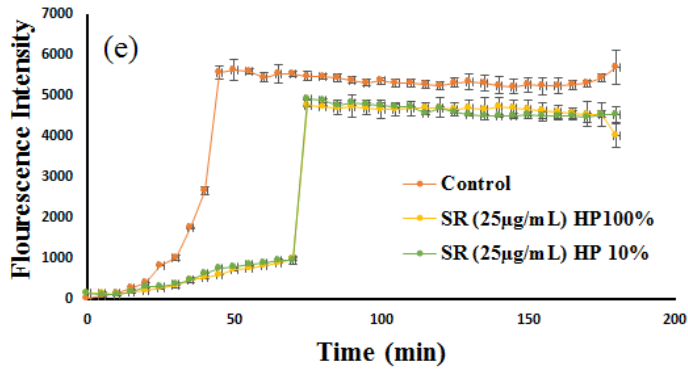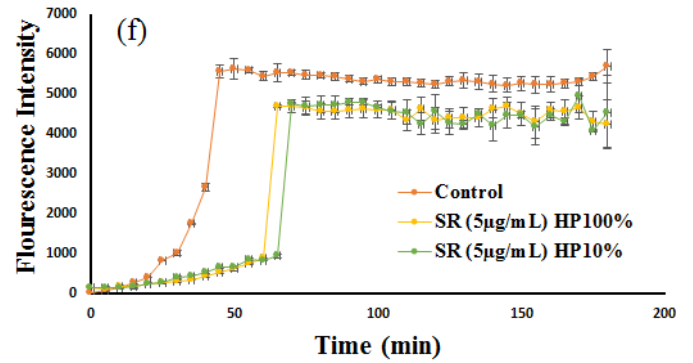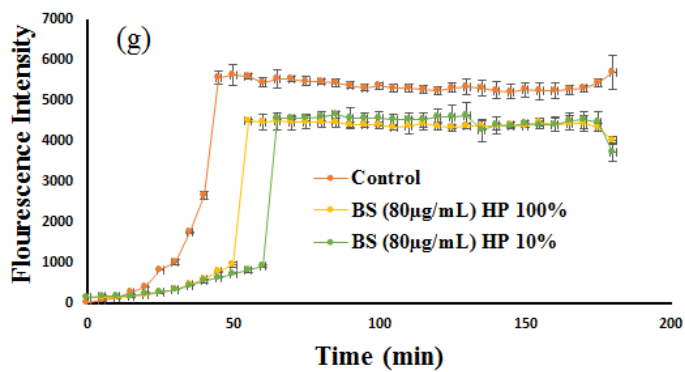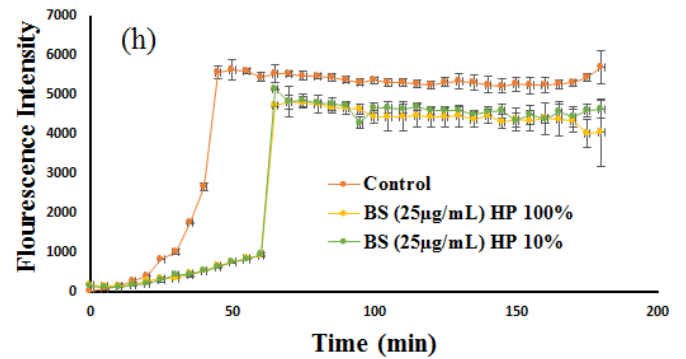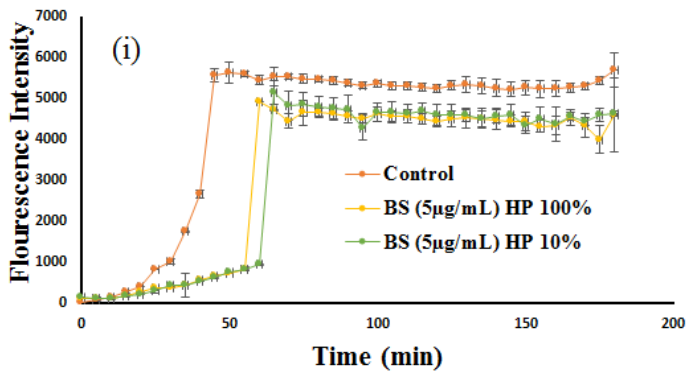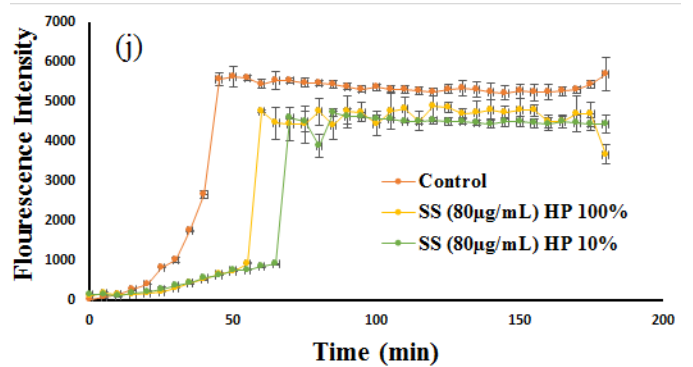



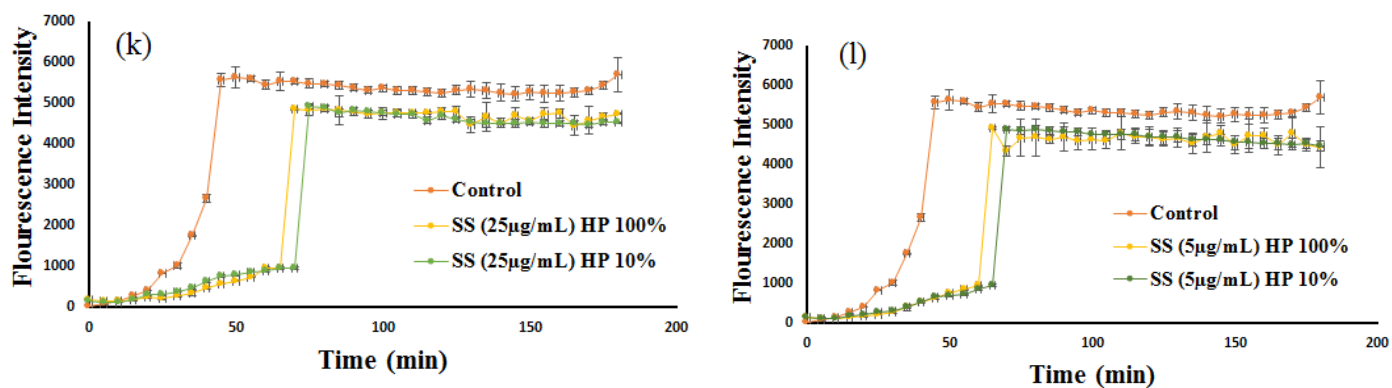

Fig. S16. Comparison between HP 10% and HP 100% for all of NPs concentration; (a, b, c) Long Rods, (d, e, f) Short Rods, (g, h, i) Small Spheres~20 nm and (j, k, l) Big Spheres~30 nm. A $\beta$  concentration is (10µM).

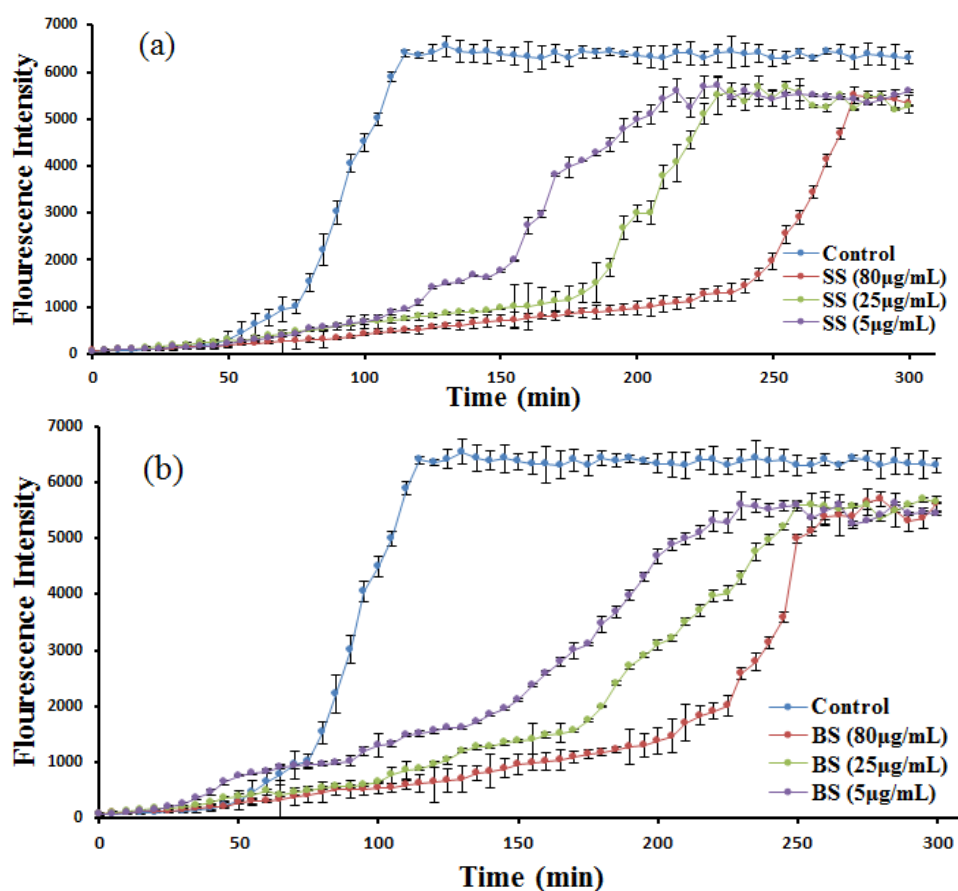

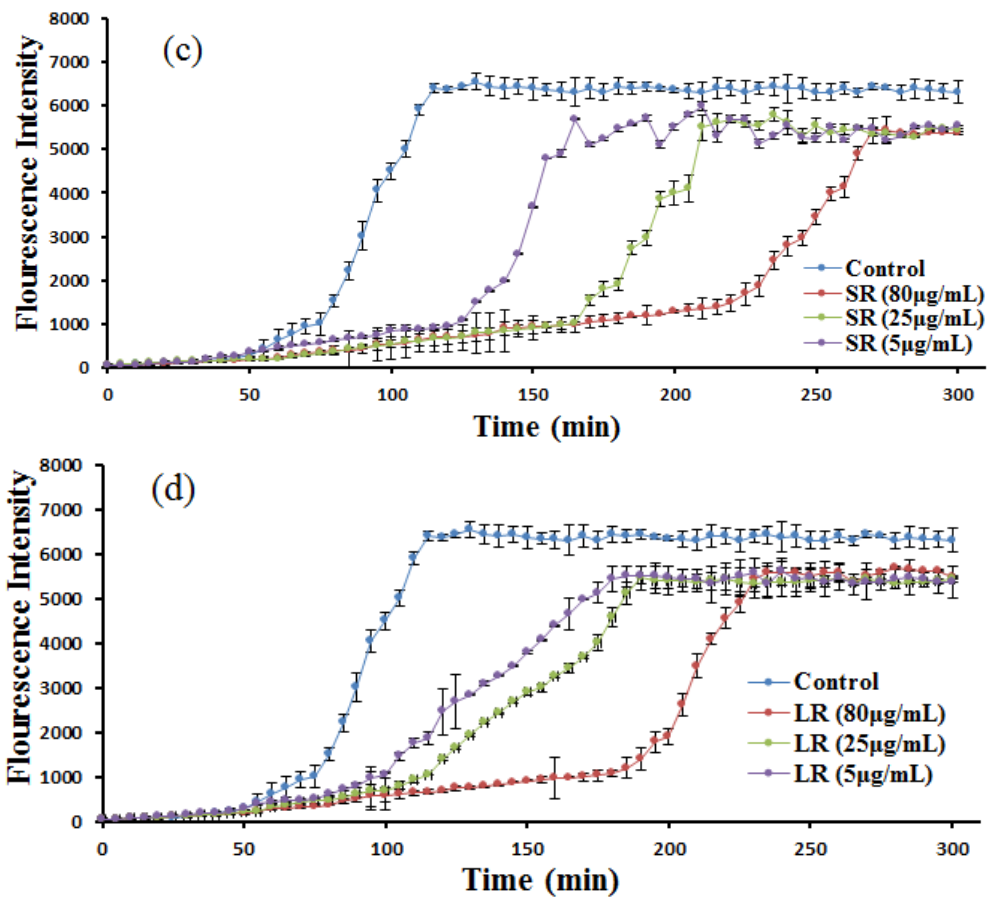

Fig. S17. Kinetic of Aβ fibrillation at difference concentrations of GNPs and GNRs (a) Small spheres, (b) Big spheres, (c) Short rods and (d) Long rods. [(after once centrifuged); Aβ concentration is (1 μM)]

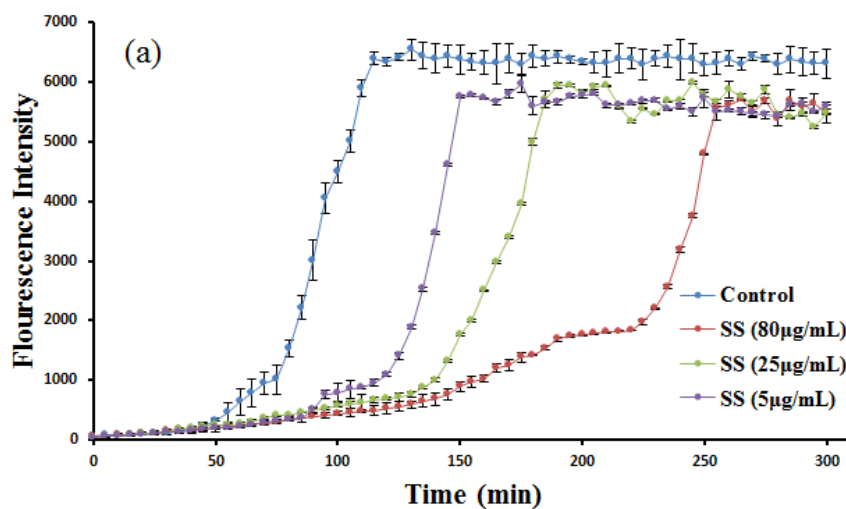

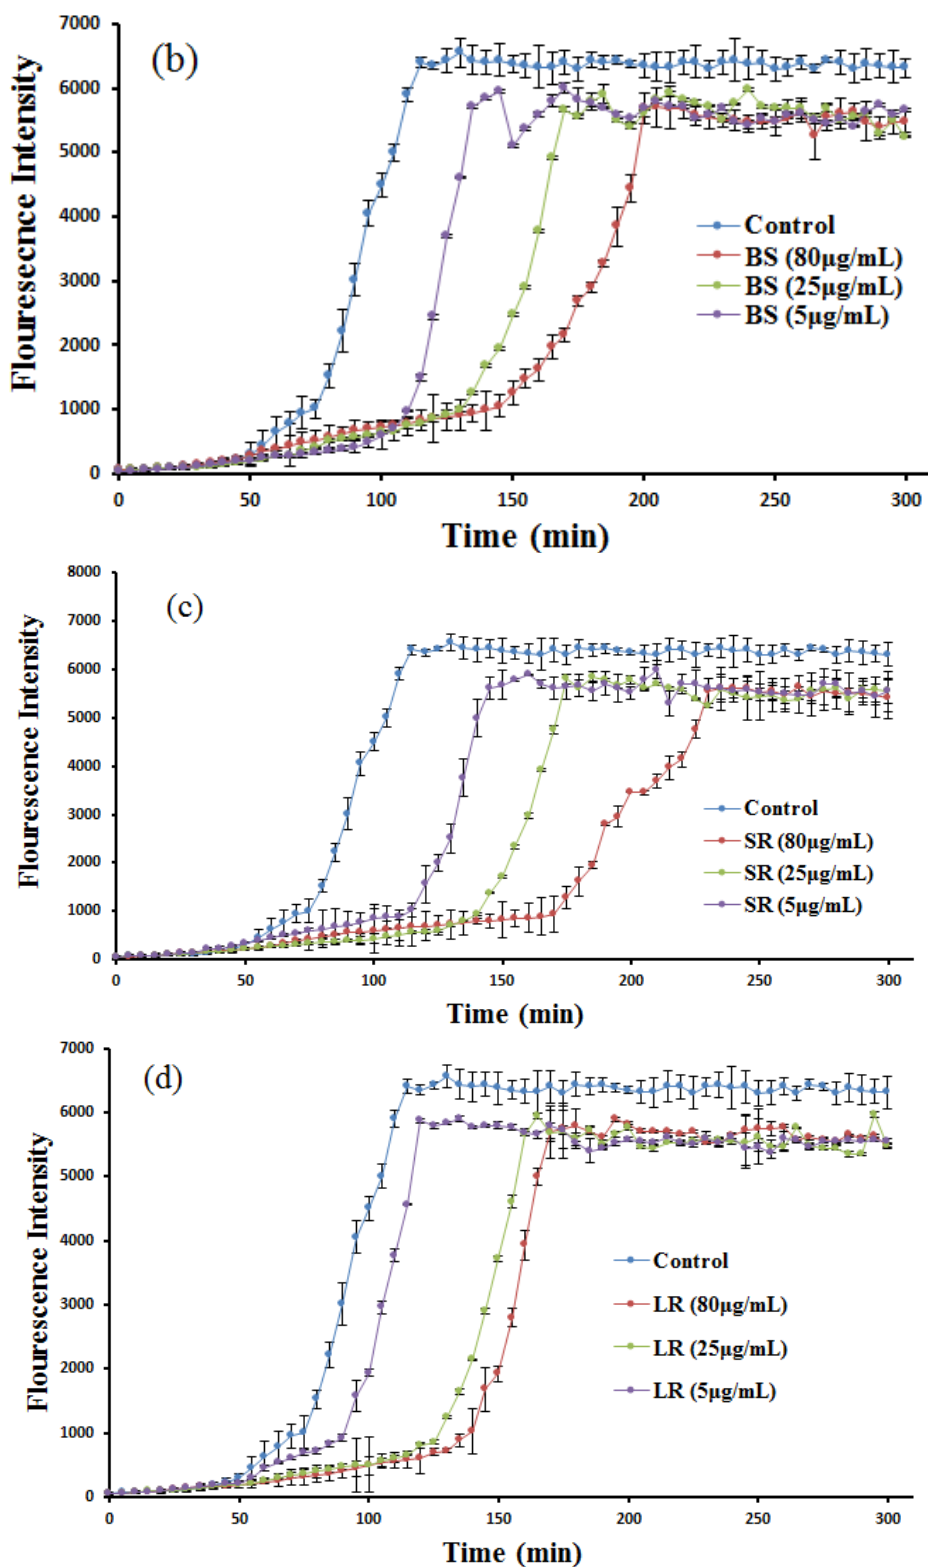

Fig. S18. Kinetic of A $\beta$  fibrillation at difference concentrations of GNPs and GNRs (a) Small spheres, (b) Big spheres, (c) Short rods and (d) Long rods. [(after thrice centrifuged); A $\beta$  concentration is (1 $\mu$ M)]

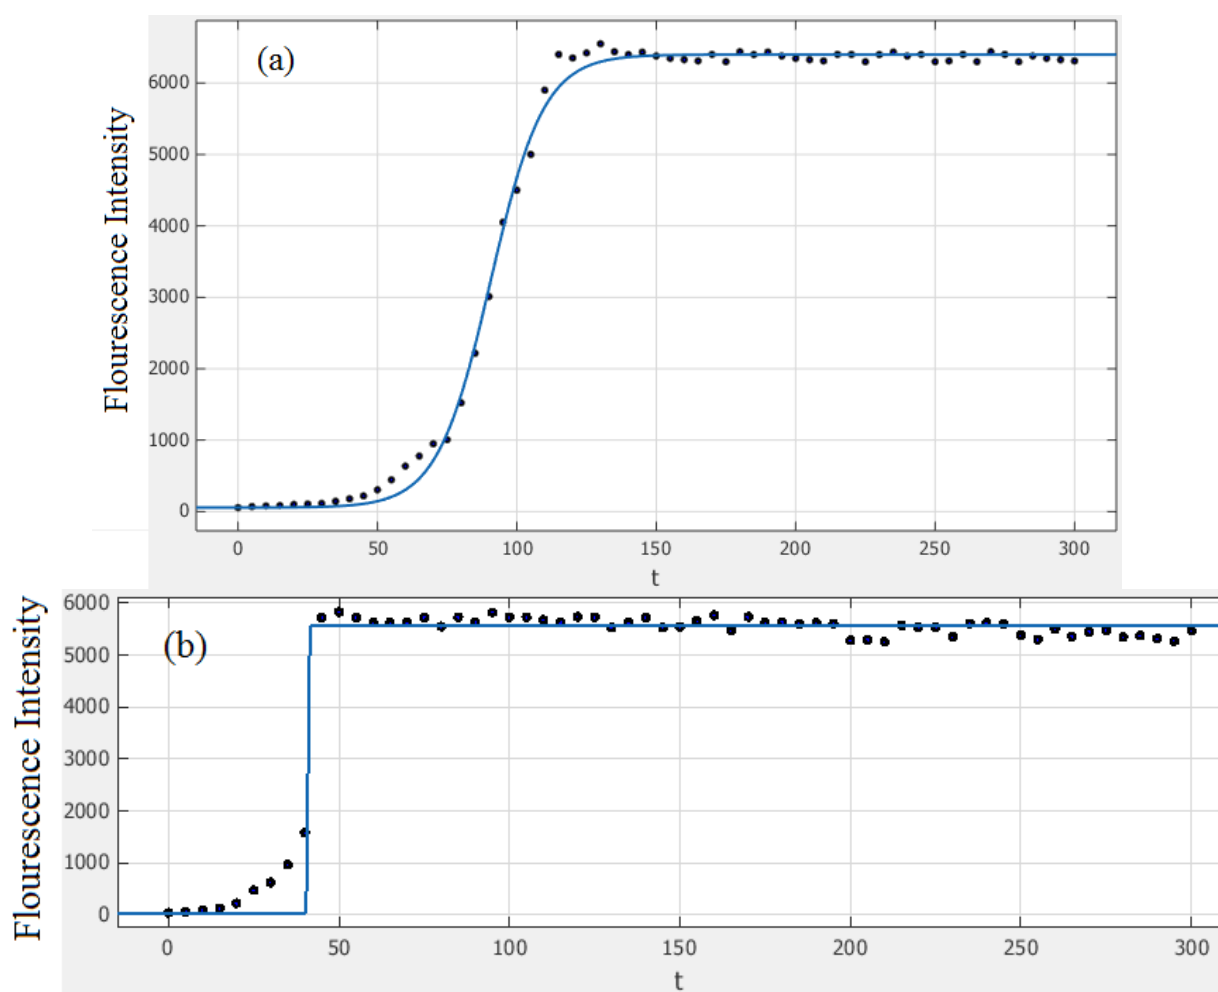

Fig. S19. Fitting charts for calculation of lag times, (a) Amyloid  $\beta$  ( $1 \mu\text{M}$ ) and (b) Amyloid  $\beta$  ( $10 \mu\text{M}$ ).

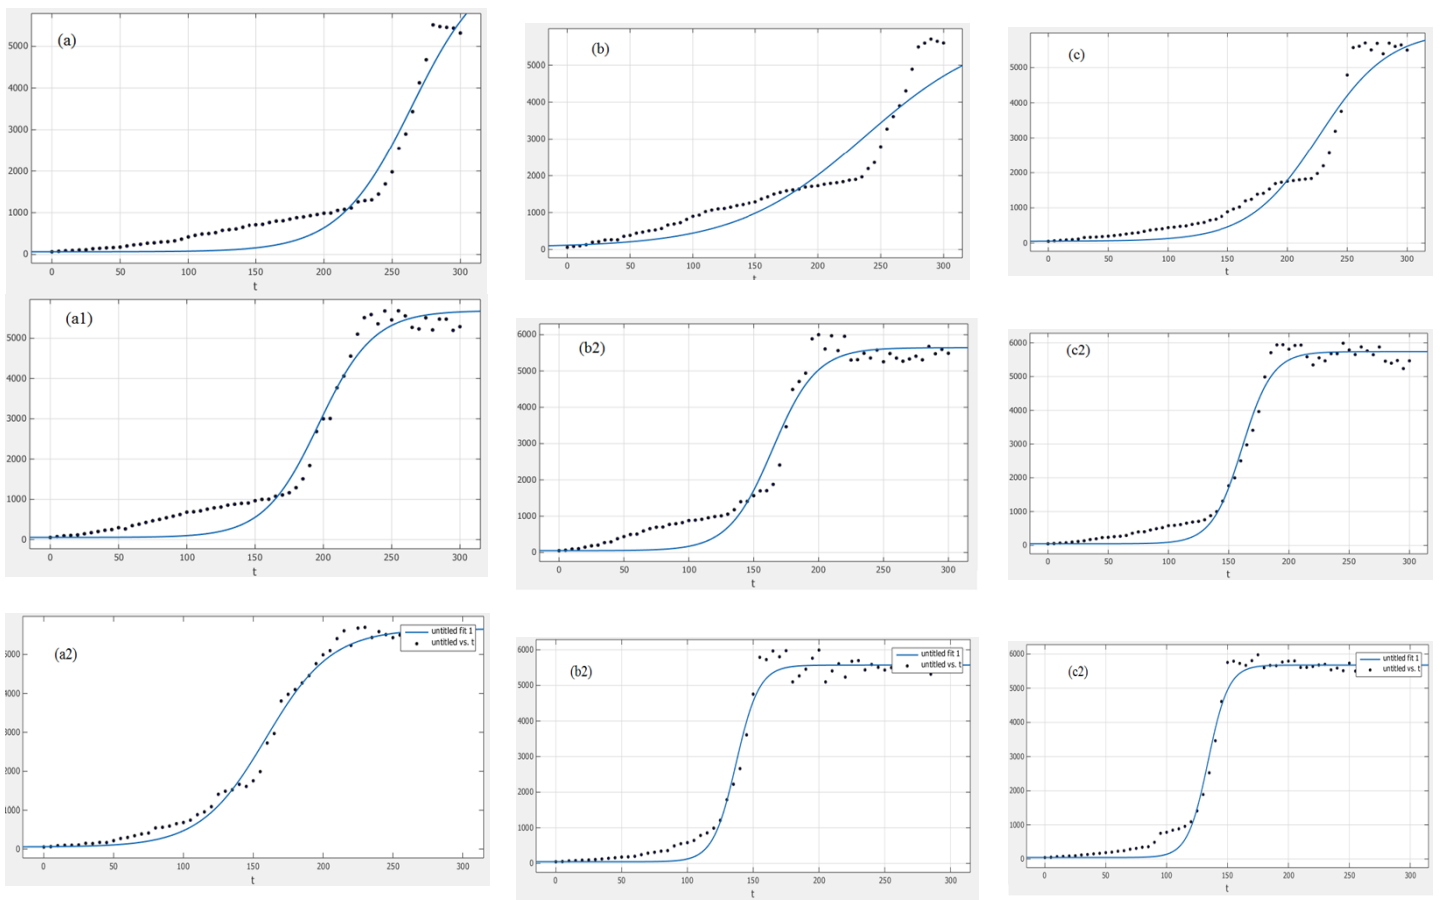

Fig. S20. Fitting Chart for small spheres  $\sim 20$  nm (a)  $80\mu\text{g/mL}$  (without centrifuged), (b)  $80\mu\text{g/mL}$  (once centrifuged), (c)  $80\mu\text{g/mL}$  (thrice centrifuged), (a1)  $25\mu\text{g/mL}$  (without centrifuged), (b1)  $25\mu\text{g/mL}$  (once centrifuged), (c1)  $25\mu\text{g/mL}$  (thrice centrifuged), (a2)  $80\mu\text{g/mL}$  (without centrifuged), (b2)  $5\mu\text{g/mL}$  (once centrifuged) and (c2)  $5\mu\text{g/mL}$  (thrice centrifuged).

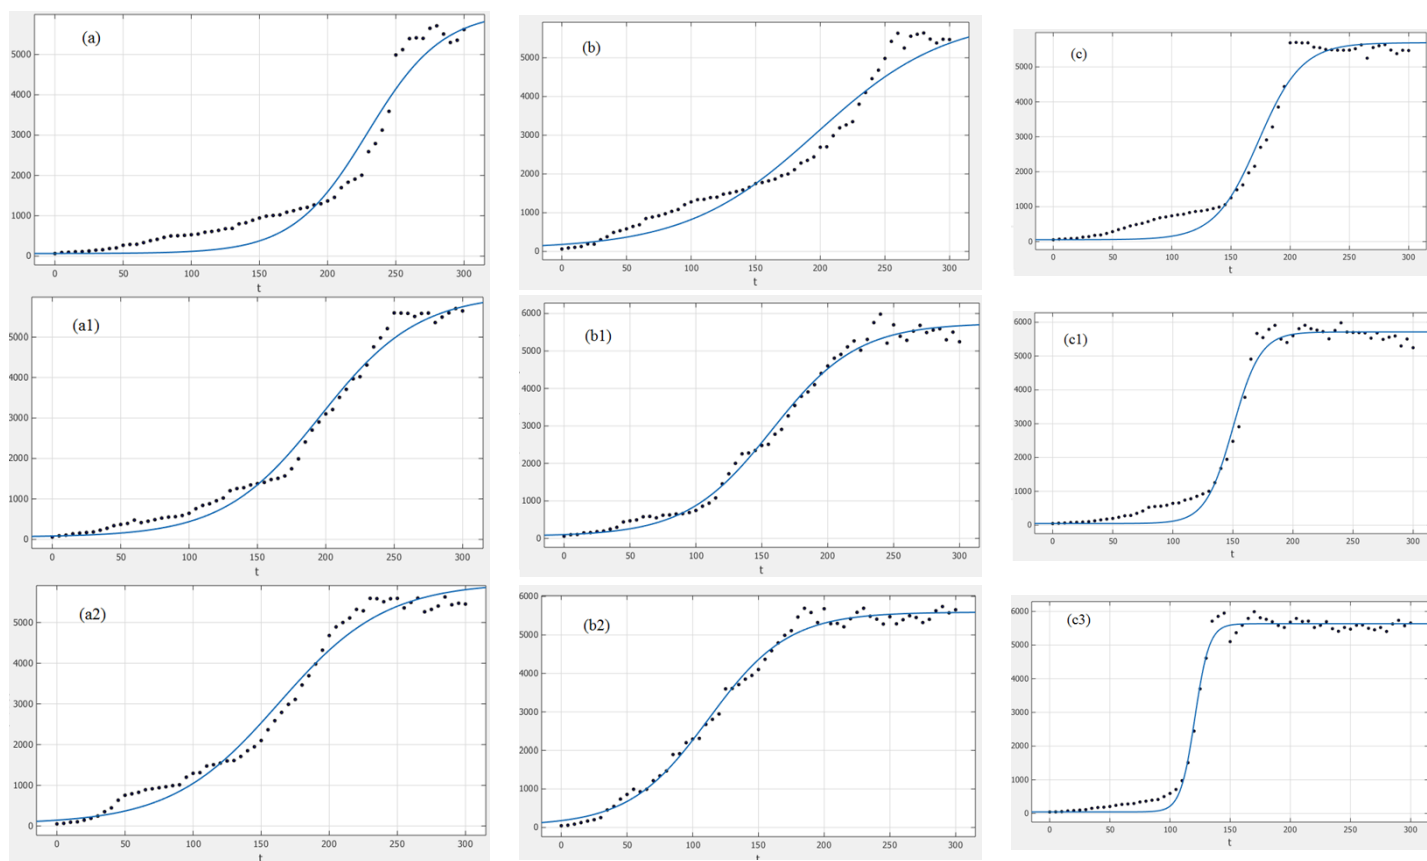

Fig. S21. Fitting Chart for big spheres  $\sim 30$  nm (a)  $80\mu\text{g/mL}$  (without centrifuged), (b)  $80\mu\text{g/mL}$  (once centrifuged), (c)  $80\mu\text{g/mL}$  (thrice centrifuged), (a1)  $25\mu\text{g/mL}$  (without centrifuged), (b1)  $25\mu\text{g/mL}$  (once centrifuged), (c1)  $25\mu\text{g/mL}$  (thrice centrifuged), (a2)  $80\mu\text{g/mL}$  (without centrifuged), (b2)  $5\mu\text{g/mL}$  (once centrifuged) and (c2)  $5\mu\text{g/mL}$  (thrice centrifuged).

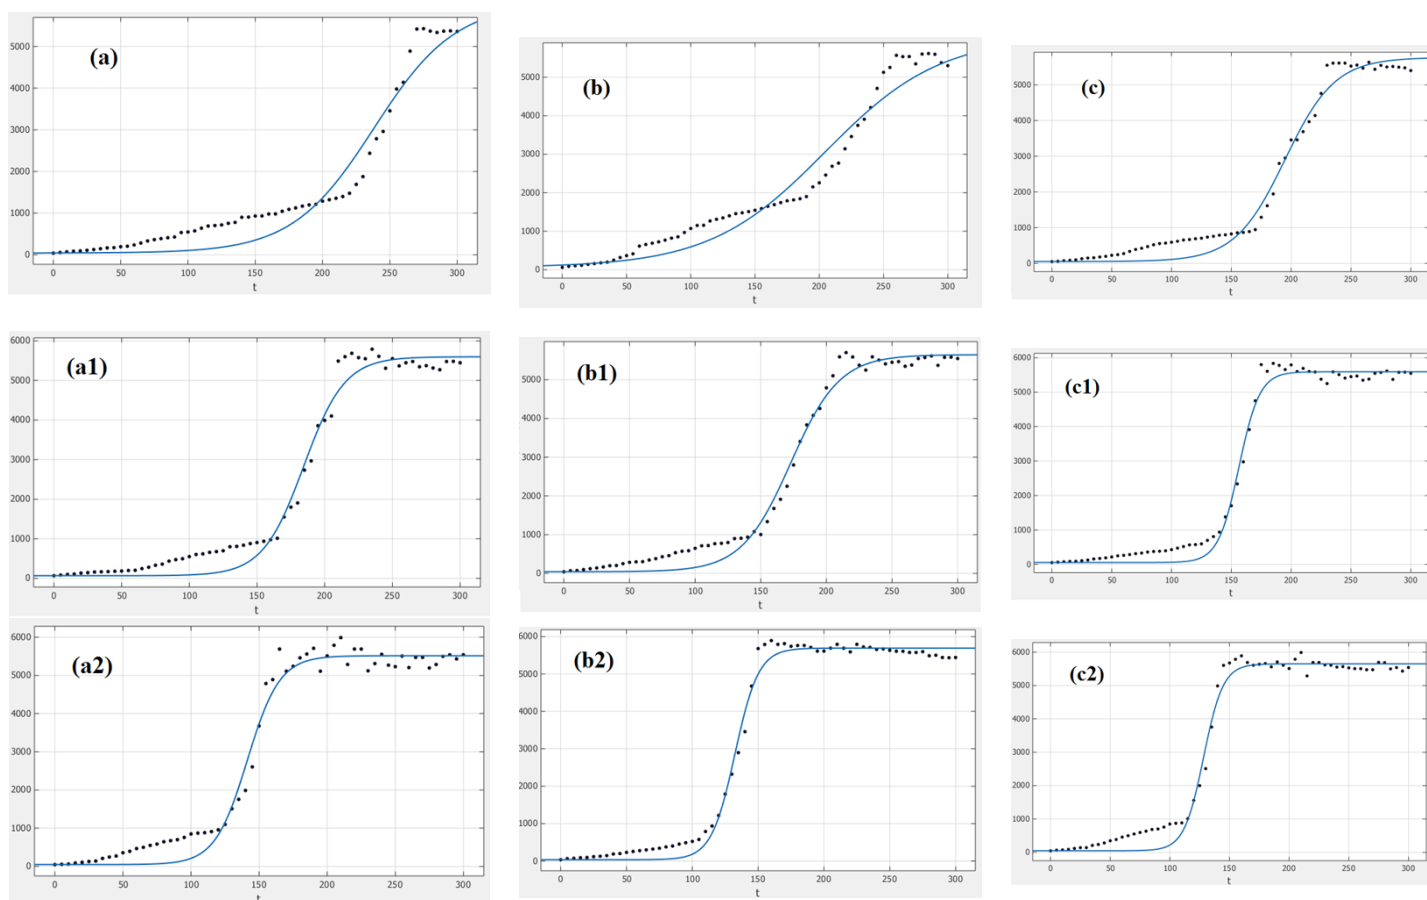

Fig. S22. Fitting Chart for short rods (a)  $80\mu\text{g/mL}$  (without centrifuged), (b)  $80\mu\text{g/mL}$  (once centrifuged), (c)  $80\mu\text{g/mL}$  (thrice centrifuged), (a1)  $25\mu\text{g/mL}$  (without centrifuged), (b1)  $25\mu\text{g/mL}$  (once centrifuged), (c1)  $25\mu\text{g/mL}$  (thrice centrifuged), (a2)  $80\mu\text{g/mL}$  (without centrifuged), (b2)  $5\mu\text{g/mL}$  (once centrifuged) and (c2)  $5\mu\text{g/mL}$  (thrice centrifuged).

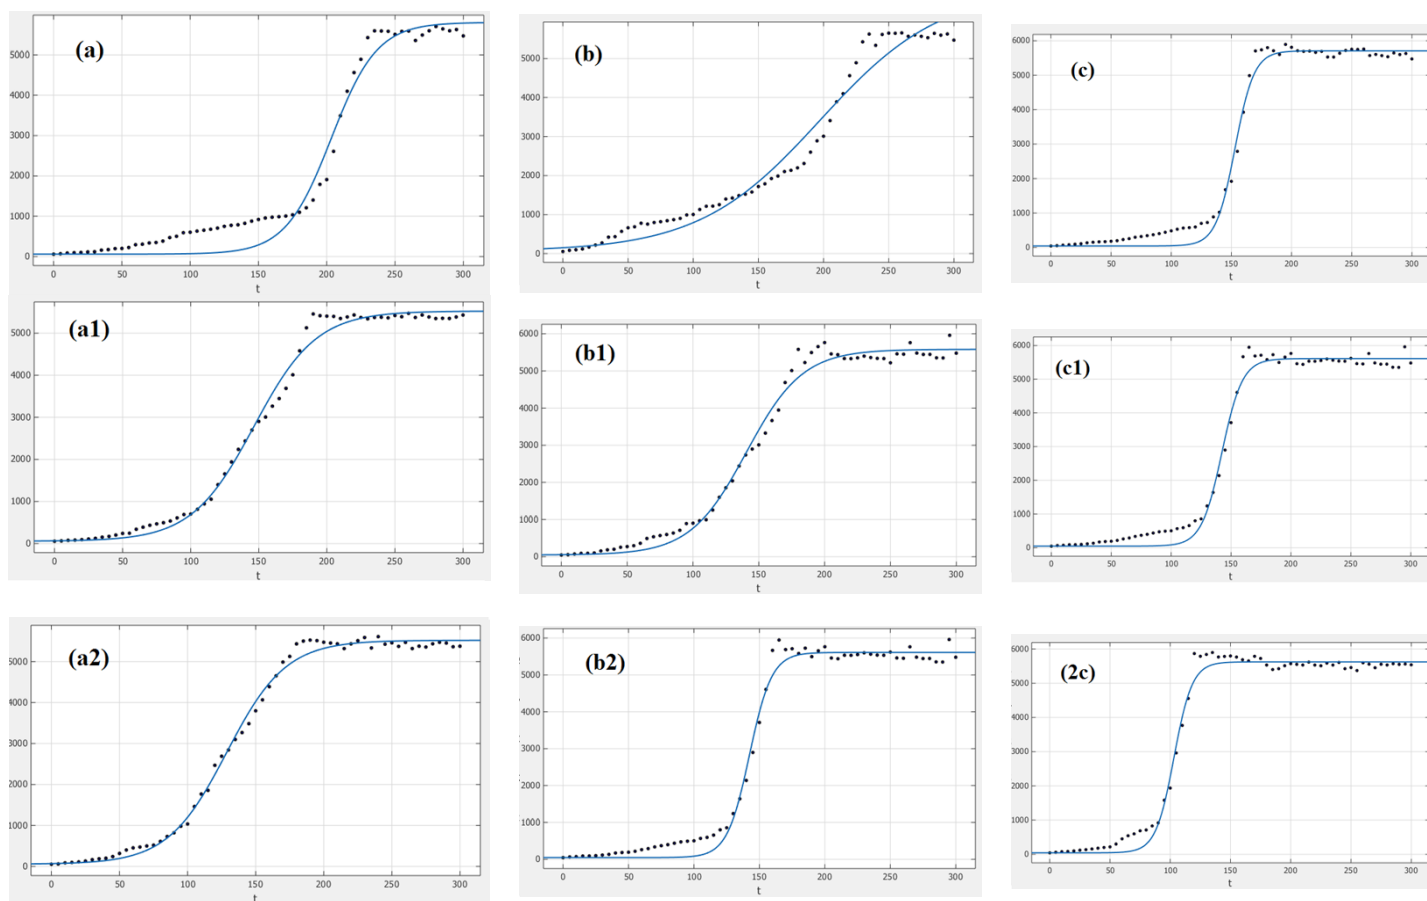

Fig. S23. Fitting Chart for long rods (a)  $80\mu\text{g/mL}$  (without centrifuged), (b)  $80\mu\text{g/mL}$  (once centrifuged), (c)  $80\mu\text{g/mL}$  (thrice centrifuged), (a1)  $25\mu\text{g/mL}$  (without centrifuged), (b1)  $25\mu\text{g/mL}$  (once centrifuged), (c1)  $25\mu\text{g/mL}$  (thrice centrifuged), (a2)  $80\mu\text{g/mL}$  (without centrifuged), (b2)  $5\mu\text{g/mL}$  (once centrifuged) and (c2)  $5\mu\text{g/mL}$  (thrice centrifuged).
